# Supplementary material for: Informational value of percent body fat with body mass index for the risk of abnormal blood glucose: a nationally representative cross-sectional study
Source: PubMed Central journal article supplement — BMJ Open. 2018 Apr 13;8(4):e019200. doi: 10.1136/bmjopen-2017-019200 (PMC5905746; doi:10.1136/bmjopen-2017-019200), 2018-04-13
Supplement: bmjopen-2017-019200.draft_revisions.pdf [file bmjopen-2017-019200.draft_revisions.pdf]

# BMJ Open

BMJ Open is committed to open peer review. As part of this commitment we make the peer review history of every article we publish publicly available.

When an article is published we post the peer reviewers' comments and the authors' responses online. We also post the versions of the paper that were used during peer review. These are the versions that the peer review comments apply to.

The versions of the paper that follow are the versions that were submitted during the peer review process. They are not the versions of record or the final published versions. They should not be cited or distributed as the published version of this manuscript.

BMJ Open is an open access journal and the full, final, typeset and author-corrected version of record of the manuscript is available on our site with no access controls, subscription charges or pay-per-view fees (<http://bmjopen.bmj.com>).

If you have any questions on BMJ Open's open peer review process please email [info.bmjopen@bmj.com](mailto:info.bmjopen@bmj.com)

# BMJ Open

## The informational value of percent body fat integrating with body mass index associated with risk of abnormal blood glucose

|                                 |                                                                                                                                                                                |
|---------------------------------|--------------------------------------------------------------------------------------------------------------------------------------------------------------------------------|
| Journal:                        | <i>BMJ Open</i>                                                                                                                                                                |
| Manuscript ID                   | bmjopen-2017-019200                                                                                                                                                            |
| Article Type:                   | Research                                                                                                                                                                       |
| Date Submitted by the Author:   | 17-Aug-2017                                                                                                                                                                    |
| Complete List of Authors:       | Jo, Ara; University of Florida, Health Services Research, Management and Policy;<br>Mainous III, Arch; University of Florida, Health Services Research, Management, and Policy |
| <b>Primary Subject Heading</b>: | Diabetes and endocrinology                                                                                                                                                     |
| Secondary Subject Heading:      | Epidemiology                                                                                                                                                                   |
| Keywords:                       | DIABETES & ENDOCRINOLOGY, Protocols & guidelines < HEALTH SERVICES ADMINISTRATION & MANAGEMENT, PUBLIC HEALTH                                                                  |
|                                 |                                                                                                                                                                                |

SCHOLARONE™  
Manuscripts

1  
2  
3 The informational value of percent body fat integrating with body mass index associated with  
4 risk of abnormal blood glucose  
5

6  
7 Ara Jo, MS <sup>1</sup>, Arch G. Mainous III, PhD <sup>1,2</sup>  
8  
9

10  
11 1. Department of Health Services Research, Management and Policy, College of Public Health  
12 and Health Professions, University of Florida, Gainesville, Florida  
13

14 2. Department of Family Medicine and Community Health, College of Medicine, University of  
15 Florida, Gainesville, Florida  
16  
17

18  
19  
20 Corresponding Author:  
21

22 Ara Jo

23 Department of Health Services Research, Management and Policy

24 University of Florida

25 Health Sciences Center, PO Box 100195

26 Gainesville, FL 32610 USA

27 Phone: 352-273-6073

28 Fax: 352-273-6075

29 Email: [ara13j@ufl.edu](mailto:ara13j@ufl.edu)  
30  
31  
32  
33  
34  
35  
36  
37

38 Source of support: None.  
39  
40

41 Word Count: 2,543

42 Number of Tables: 3

43 Conflict of Interest: The authors have no conflicts to declare.  
44  
45  
46  
47  
48  
49  
50  
51  
52  
53  
54  
55  
56  
57

## ABSTRACT

**Objective:** The purpose of the study is to examine the value of percent body fat (%BF) with BMI to assess the risk of abnormal blood glucose (ABG) among US adults who are normal weight or overweight. We hypothesized that normal weight population with higher %BF is more likely to have ABG.

**Design:** A cross-sectional study.

**Setting:** National Health and Nutritional Examination Survey (NHANES), 1999–2006, conducted by the National Center for Health Statistics of the Centers for Disease Control and Prevention.

**Participants:** Participants were US adults aged 40 and older who have never been diagnosed with type 2 diabetes by a doctor (unweighted N=9790, weighted N=101098270). The study population was classified into four groups: 1) normal weight with normal %BF, 2) normal weight with high %BF, 3) overweight with normal %BF and 4) overweight with high %BF.

**Main outcome measures:** Odds ratios for abnormal blood glucose including prediabetes and undiagnosed diabetes (HbA1c $\geq$ 5.7%).

**Results:** 64% were misclassified as normal despite high %BF. Prevalence of ABG in normal weight group with high %BF (13.5%) is significantly higher than overweight group with lower %BF ( $p<.00$ ). In an unadjusted model, the odds ratio of ABG was significantly greater in adults at normal BMI with high %BF compared to individuals at normal weight with lower %BF. In an adjusted model controlling for age, sex, race/ethnicity, first degree of relative diabetes, vigorous-intensity activities and muscle strengthening activities, risks of ABG were greater in population with normal weight and high %BF and with overweight and low %BF (OR, 1.55, 95% CI, 1.01-2.38,  $p<.05$  vs. OR, 1.17, 95% CI, 0.69-1.98).

**Conclusions:** Integrating BMI with %BF can improve in classification to direct screening and prevention efforts to a group currently considered healthy and avoid penalties and stigmatization of other groups that are misclassified as unhealthy.

**Keywords:** abnormal glucose, diabetes prevention, percent body fat, body mass index

1  
2  
3  
4  
5  
6 Strengths and limitations of this study  
7

- 8 • The study used population-based nationally representative data allowing for  
9 generalizability.
- 10 • We used the most accurate body composition measurement, DXA to assess direct impact  
11 of excessive body fat on abnormal blood glucose.
- 12 • Percent body fat integrating with BMI improved classification of population who has  
13 excessive body fat associated with high risk of abnormal blood glucose.
- 14 • The data is relatively old while it is the most recent data including whole body DXA  
15 measurement.
- 16 • There is no gold standard cut off points in defining obesity according to percent body fat.  
17  
18  
19  
20  
21  
22  
23  
24  
25  
26  
27  
28  
29  
30  
31  
32  
33  
34  
35  
36  
37  
38  
39  
40  
41  
42  
43  
44  
45  
46  
47  
48  
49  
50  
51  
52  
53  
54  
55  
56  
57  
58  
59  
60

## Introduction

Diabetes has become a worldwide epidemic. It is one of leading causes of morbidity and mortality in the US and its prevalence has been steadily increasing (1, 2). The prevalence of diagnosed diabetes reached to 12.3% of US adults in 2011-2012.<sup>1</sup> Furthermore, the total direct medical costs for diabetes was \$176 billion in 2012 and health care expenditure for people with diabetes is more than 2 times higher than people without diabetes (3).

In an effort to prevent diabetes and identify patients with undiagnosed diabetes for potential treatment, the United States Preventive Services Task Force (USPSTF) recommends screening asymptomatic adults for abnormal blood glucose (prediabetes or undiagnosed diabetes) (4, 5). The USPSTF recommends screening adults aged 40-70 only if they are overweight or obese using body mass index (BMI) cutoffs (USPSTF, 2014). Recently, the Equal Employment Opportunity Commission (EEOC) proposed the rule that if employees who are overweight or obese fail to achieve a normal weight ( $18.5-24.9\text{kg/m}^2$ ) through wellness programs, they penalize the employees who participate into wellness program up to 30% of the total costs of health insurance (6). Consequently, BMI levels have substantial implications for defining someone as healthy or unhealthy.

BMI which is widely adopted to assess obesity-related risk in clinical setting, however, may misclassify some segments of the general population who are at metabolic risk. BMI is based on height and weight and body weight that includes not only body fat but also muscle, bone and body water (7). Recent studies found that half of people who were obese according to percent body fat (%BF) but were classified as normal weight defining by BMI, and about 18% of adults with excessive %BF who were misclassified as not obese showed a significant higher prevalence of metabolic syndrome (8, 9). Recent data indicates that a significant proportion of people with a normal weight designated by BMI ( $18.5-24.9\text{ kg/m}^2$ ) have prediabetes, undiagnosed diabetes and hypertension (10-12). In fact, 33% of adults 45 and older at a normal weight have prediabetes. Moreover, normal weight obesity (NWO) which represents an individual who fall into normal range of BMI and who have excessive body fat mass is associated with higher risk of metabolic syndrome, cardiometabolic dysregulation and cardiovascular mortality (13, 16). On the other hand, professional football players who are

1  
2  
3 typically classified as being obese due to high muscle mass actually showed better  
4 cardiovascular health compared to the general population (17).  
5  
6

7  
8 Because of the possible deleterious consequences due to BMI misclassification, percent  
9 body fat (%BF) may have some value as an addition to BMI to improve classification of  
10 individuals as healthy or unhealthy in terms of abnormal blood glucose (14, 15, 18). However,  
11 the extent to which adding %BF to BMI improves classification of risk is unclear. There has  
12 been little investigation to determine the incremental value of combining BMI and %BF in a risk  
13 assessment for abnormal blood glucose. Therefore, the purpose of this study is to examine in a  
14 nationally representative sample the value of %BF with BMI to assess the risk of abnormal  
15 glucose among adults who are normal weight or overweight and improve classification.  
16  
17  
18  
19  
20  
21

## 22 Methods

23  
24 We analyzed the nationally representative, National Health and Nutrition Examination  
25 Survey (NHANES) for the years of 1999-2006. Although there are more recent NHANES data,  
26 this is the most recent data with a whole body Dual-energy X-ray Absorptiometry (DXA) which  
27 measures %BF. The NHANES is a national representative survey of noninstitutionalized US  
28 population using a complex stratified multistage probability cluster sample design. To account  
29 for nationally representative population estimates, the National Center for Health Statistics  
30 (NCHS) applies a multilevel weighting system. The survey included a standardized medical  
31 examination including blood and urine analysis for examining biomarkers and a number of  
32 health-related interviews. The current study was approved as exempt by the Institutional Review  
33 Board (IRB) at the University of Florida.  
34  
35  
36  
37  
38  
39  
40  
41

## 42 Anthropometric Assessment

43  
44  
45 BMI was obtained from body weight divided by height squared ( $\text{kg/m}^2$ ). Weight and  
46 height were measured by a trained examiner in the mobile examination center and these were  
47 used to calculate BMI (19). BMI values were categorized into four groups (i.e., underweight,  
48 normal weight, overweight and obesity) on the basis of WHO guideline (7). Percent body fat  
49 (%BF) was derived from 1-3 times weekly measured whole body DXA scan (Hologic, Inc.,  
50 Bedford, Massachusetts) (20). A sex-specific threshold of %BF was adopted as 25% for men and  
51 32% for women from preliminary studies (14, 15, 18).  
52  
53  
54  
55  
56  
57

## Participants

The current study focused on adults aged over 40 or older who have never been told by a doctor or a health professional that they have diabetes (unweighted n=9,790). We focused on individuals 40 and older since 40 is the lower age cutoff for screening for abnormal blood glucose as suggested by the USPSTF.<sup>4</sup> The study population was individuals with normal weight or overweight as defined by BMI. We limited the study to these individuals because they were the groups most likely to potentially be reclassified by the addition of %BF to BMI.

Participants were classified into four groups based on combined BMI and %BF. In normal BMI (18.5-24.9 kg/m<sup>2</sup>), the first group would be assessed to be at low risk based on being normal on two different criteria (normal BMI and low %BF). The second group may be misclassified as healthy even though existing data suggests a substantial population have prediabetes (normal BMI but high %BF) (12). Among individuals classified as overweight by BMI (25-29.9 kg/m<sup>2</sup>), the third group may be misclassified as unhealthy, but they may be healthy due to the BMI limitation of not appropriately assessing extensive muscle mass (overweight and low %BF). The fourth group would be at high risk based on having excessive fat (overweight and high %BF). Pregnant women who were not allowed to test the DXA examination were excluded. Also we excluded the obese population because of the known high risk.

## Outcomes

The primary outcome is an abnormal glucose including prediabetes or undiagnosed diabetes, an HbA1c level of 5.7% or higher. All subjects reported never having been told by a doctor or a health professional that they had prediabetes or diabetes (5). We excluded individuals with an HbA1c of 4.0% (20 mmol/mol) that is associated with increased mortality without diabetes (21).

## Covariates

Age was classified into two groups with cut offs of 40 and 71 years old. Race/ethnicity was categorized into four groups, 1) Non-Hispanic White, 2) Non-Hispanic Black, 3) Hispanics and 4) Other. Family history of diabetes was defined as a report of a first degree of relative ever being told by a health professional that they had diabetes.



1  
2  
3 Although, not specifically seen as a potential confounder we also assessed physical  
4 activity. Vigorous activity was defined as reports of an activity that causes light seating or a  
5 slight to moderate increase in breathing or heart rate for at least 10 minutes over the past 30 days.  
6  
7 Muscle strengthening activity refers to any physical activities designed to strengthen muscles  
8 including lifting weights, push-ups or sit-ups over the past 30 days.  
9  
10  
11

## 12 Statistical Analysis

13  
14  
15 To account for the stratified multistage probability sample design, we used SAS 9.4  
16 (Cary, NC) and SUDAAN software (RTI, NC) for data analyses. Weighting and design variables  
17 applied to all analyses from univariate analyses, chi-square tests and logistic regression models.  
18 They allow us to estimate population estimates for noninstitutionalized US population. We  
19 examined bivariate relationship between combined BMI/%BF and abnormal glucose. Following  
20 by, both unadjusted and adjusted logistic regressions controlling for age, sex, race/ethnicity,  
21 family history of diabetes, vigorous activity and muscle strengthening activity was employed to  
22 assess likelihood of having abnormal blood glucose.  
23  
24  
25  
26  
27  
28  
29

## 30 Results

31  
32 The total unweighted sample size was 9,790 adults representing 101,098,270 adults in the  
33 US population. Table 1 showed that among normal weight population, approximately 64% were  
34 misclassified as normal despite high %BF. Prevalence of abnormal glucose by combined BMI  
35 and %BF is shown in Table 2. Prevalence of abnormal glucose in normal weight group with high  
36 %BF (13.5%) is significantly higher than overweight group with lower %BF (10.5%) ( $p < .00$ ).  
37 About 78% of population was adults aged between 40 to 70 and non-Hispanic White. In sex,  
38 most men showed low %BF whereas more than 70% of women has excessive body fat within  
39 normal weight population. Regardless of BMI, more than 40% of population with low %BF  
40 performed vigorous-intensity activity as well as muscle strengthening activity compared to  
41 population with high %BF ( $p < .00$ ).  
42  
43  
44  
45  
46  
47  
48  
49

50 In an unadjusted logistic regression, the odds ratio of abnormal glucose was significantly  
51 greater in adults at normal weight with high %BF compared to individuals at normal weight with  
52 low %BF as the reference group (Table 3). Conversely, abnormal glucose risk was not  
53 significantly more likely in overweight adults with low %BF when compared to the normal  
54  
55  
56  
57

1  
2  
3 weight/low %BF group. In an adjusted model controlling for age, sex, race/ethnicity, first degree  
4 of relative diabetes, vigorous-intensity activities and muscle strengthening activities the adjusted  
5 model results were similar to the unadjusted results. Risks of abnormal glucose were greater in  
6 population with normal weight and high %BF and with overweight and low %BF, whereas only  
7 odds ratios among individuals with high %BF were significantly higher compared with the  
8 reference group (Table 3).  
9  
10  
11  
12

## 13 Discussion

14  
15  
16  
17 The use of BMI only may misclassify segments of the adult population in terms of  
18 abnormal glucose. Our key findings showed that individuals with normal weight who have  
19 excessive percent body fat (%BF) have significantly higher risk of abnormal glucose compared  
20 with individuals with normal weight and low %BF. Conversely, of individuals with overweight,  
21 low %BF is not significantly associated with the risk of abnormal glucose. The results suggest  
22 that %BF combined with BMI may help to improve risk stratification for abnormal blood  
23 glucose in these intermediate groups.  
24  
25  
26  
27  
28  
29

30 Since body weight comprises not only fat but also a variety of body compositions such as  
31 muscle, organs and body water, it may not estimate actual amount of body fat. Professional  
32 football players who are typically classified as obesity due to high muscle mass showed better  
33 cardiovascular health compared to general population (17). In addition, among military  
34 population, whereas an average of BMI was overweight, almost half of them had never had any  
35 form of sickness absence (22). These evidences indicate that %BF may be a key factor in  
36 estimating risk of chronic disease and it may provide more valuable evidence of obesity-induced  
37 inflammatory pathway beyond simply measuring BMI.  
38  
39  
40  
41  
42  
43

44 Our key findings may suggest refinement of current clinical guidelines with additional  
45 body composition assessments. The USPSTF and the American Diabetes Association (ADA)  
46 have BMI as a key component of recommendations for diabetes prevention (4, 5). There may be  
47 missed opportunities for screening, particularly for prediabetes. Using a concept of normal  
48 weight obesity has an opportunity to better detect this at risk population to receive appropriate  
49 prevention services. It is also important, as shown in our findings, that we appropriately classify  
50 the overweight population with low %BF. This population has been neglected as being classified  
51  
52  
53  
54  
55  
56  
57

1  
2  
3 as a healthy population. These individuals are more likely to perform high-intensity physical  
4 activities. Professional athletes or civil forces with higher muscle mass who are typically  
5 classified as obesity measured by BMI may fail to meet normal BMI criteria in recruitment  
6 screening (23). In addition, according to the rule offered by EEOC, employees who are classified  
7 as overweight or obesity with high muscle mass and lower body fat may get penalized (6). To  
8 prevent these adverse events, more accurate body composition assessment may be required.  
9  
10  
11  
12  
13

#### 14 Limitations

15  
16  
17 There are limitations to this study. First, there is no gold standard clinical cut point to  
18 indicate high or low percentage body fat. While numerous studies used a variety of sex-specific  
19 thresholds, sensitivity analysis has not been implemented yet. The current study however,  
20 adopted commonly used criteria as a way to promote generalizability and comparability to other  
21 studies. Second, although this is a study investigating the association between several  
22 physiological measures, the data is not the most recent NHANES and so population estimates  
23 may not totally represent the current US population. While there are more recent NHANES data,  
24 the data used in the study is the most recent data with a whole body DXA measurement. We felt  
25 that the validity of the DXA scan for %BF was a strength that outweighed the recent data  
26 collection. Third, our analyses were cross sectional and did not allow us to look at the  
27 downstream risks of individuals with normal weight obesity. However, our primary goal was to  
28 improve on BMI in the accuracy of screening guidelines for individuals with current abnormal  
29 blood glucose which thereby requires cross-sectional analyses.  
30  
31  
32  
33  
34  
35  
36  
37  
38  
39

#### 40 Conclusion

41  
42  
43 BMI which is typically used to define normal weight or overweight in a clinical setting  
44 may misclassify populations in relation to abnormal blood glucose. Integrating BMI with %BF  
45 can help in classification to direct screening and prevention efforts to a group currently  
46 considered healthy and avoid penalties and stigmatization of other groups that are misclassified  
47 as unhealthy.  
48  
49  
50  
51  
52  
53  
54  
55  
56  
57  
58  
59  
60

1  
2  
3 Acknowledgments

4  
5 Contributors:

6 Ara Jo, MS led the entire research as the first author from writing the manuscript, analyzing the  
7 data and interpretation.  
8

9  
10 Dr. Arch G. Mainous, PhD supervised the entire process of the research as a research mentor and  
11 contributed to writing the manuscript.  
12

13  
14  
15 Competing interests: None declared.  
16

17  
18 Funding statement: This research received no specific grant from any funding agency in the  
19 public, commercial or not-for-profit sectors.  
20  
21

22  
23  
24 Ethics approval: This study was approved as exempt by the Institutional Review Board at the  
25 University of Florida.  
26

27  
28  
29 Data sharing statement: Data are available through the National Health and Nutrition  
30 Examination Survey access from <https://www.cdc.gov/nchs/nhanes/index.htm>.  
31  
32

## Reference

1. Menke A, Casagrande S, Geiss L, Cowie CC. Prevalence of and Trends in Diabetes Among Adults in the United States, 1988-2012. *JAMA*. 2015;314(10):1021-9. Epub 2015/09/09.
2. Ma J, Ward EM, Siegel RL, Jemal A. Temporal Trends in Mortality in the United States, 1969-2013. *JAMA*. 2015;314(16):1731-9. Epub 2015/10/28.
3. ADA. Economic costs of diabetes in the US in 2012. *Diabetes care*. 2013;36(4):1033.
4. U.S. Preventive Services Task Force. US. Final Recommendation Statement Healthful Diet and Physical Activity: Counseling Adults with High Risk for CVD. *US Preventive Services Task Force*, 2014.
5. ADA. Standards of Diabetes Care in Diabetes-2016. *Diabetes Care*. 2016;39(supplement 1):S1-S106.
6. EEOC. Questions and Answers about EEOC's Notice of Proposed Rulemaking on Employer Wellness Programs. US Equal Employment Opportunity Commission; Available from: [https://www.eeoc.gov/laws/regulations/qanda\\_nprm\\_wellness.cfm](https://www.eeoc.gov/laws/regulations/qanda_nprm_wellness.cfm).
7. WHO. Physical status: The use of and interpretation of anthropometry, *Report of a WHO Expert Committee*. 1995.
8. Okorodudu D, Jumean M, Montori VM, Romero-Corral A, Somers V, Erwin P, et al. Diagnostic performance of body mass index to identify obesity as defined by body adiposity: a systematic review and meta-analysis. *International Journal of Obesity*. 2010;34(5):791-9.
9. Peterson MD, Al Snih S, Stoddard J, Shekar A, Hurvitz EA. Obesity misclassification and the metabolic syndrome in adults with functional mobility impairments: Nutrition Examination Survey 2003–2006. *Preventive Medicine*. 2014;60:71-6.
10. Mainous AG, Tanner RJ, Anton SD, Jo A. Grip strength as a marker of hypertension and diabetes in healthy weight adults. *American journal of preventive medicine*. 2015;49(6):850-8.

- 1  
2  
3 11. Mainous AG, Tanner RJ, Anton SD, Jo A, Luetke MC. Physical Activity and Abnormal  
4 Blood Glucose Among Healthy Weight Adults. *American journal of preventive medicine*.  
5 2017.  
6  
7
- 8  
9 12. Mainous AG, Tanner RJ, Jo A, Anton SD. Prevalence of prediabetes and abdominal obesity  
10 among healthy-weight adults: 18-Year trend. *The Annals of Family Medicine*.  
11 2016;14(4):304-10.  
12  
13
- 14  
15 13. Marques-Vidal P, Pécoud A, Hayoz D, Paccaud F, Mooser V, Waeber G, et al. Prevalence of  
16 normal weight obesity in Switzerland: effect of various definitions. *European journal of*  
17 *nutrition*. 2008;47(5):251-7.  
18  
19
- 20  
21 14. Romero-Corral A, Somers VK, Sierra-Johnson J, Korenfeld Y, Boarin S, Korinek J, et al.  
22 Normal weight obesity: a risk factor for cardiometabolic dysregulation and cardiovascular  
23 mortality. *European heart journal*. 2009:ehp487.  
24  
25
- 26  
27 15. Shea J, King M, Yi Y, Gulliver W, Sun G. Body fat percentage is associated with  
28 cardiometabolic dysregulation in BMI-defined normal weight subjects. *Nutrition,*  
29 *Metabolism and Cardiovascular Diseases*. 2012;22(9):741-7.  
30  
31
- 32  
33 16. Oliveros E, Somers VK, Sochor O, Goel K, Lopez-Jimenez F. The concept of normal weight  
34 obesity. *Progress in cardiovascular diseases*. 2014;56(4):426-33.  
35  
36
- 37  
38 17. Tucker AM, Vogel RA, Lincoln AE, Dunn RE, Ahrensfield DC, Allen TW, et al. Prevalence  
39 of cardiovascular disease risk factors among National Football League players. *JAMA*.  
40 2009;301(20):2111-9. Epub 2009/05/28.  
41  
42
- 43  
44 18. Gallagher D, Heymsfield SB, Heo M, Jebb SA, Murgatroyd PR, Sakamoto Y. Healthy  
45 percentage body fat ranges: an approach for developing guidelines based on body mass  
46 index. *The American journal of clinical nutrition*. 2000;72(3):694-701.  
47  
48
- 49  
50 19. CDC. NHANES: Anthropometric Procedures Manual. January 2007.  
51  
52
- 53  
54 20. NHANES. Documentation, Codebook, and Frequencies: Dual-Energy X-ray Absortometry.  
55 January 2008.  
56  
57

- 1  
2  
3 21. Carson AP, Fox CS, McGuire DK, Levitan EB, Laclaustra M, Mann DM, et al. Low  
4 hemoglobin A1c and risk of all-cause mortality among US adults without diabetes.  
5 *Circulation: Cardiovascular Quality and Outcomes*. 2010;3(6):661-7.  
6  
7  
8  
9 22. Kyröläinen H, Häkkinen K, Kautiainen H, Santtila M, Pihlainen K, Häkkinen A. Physical  
10 fitness, BMI and sickness absence in male military personnel. *Occupational Medicine*.  
11 2008;58(4):251-6.  
12  
13  
14  
15 23. Prentice AM, Jebb SA. Beyond body mass index. *Obesity reviews*. 2001;2(3):141-7.  
16  
17  
18  
19  
20  
21  
22  
23  
24  
25  
26  
27  
28  
29  
30  
31  
32  
33  
34  
35  
36  
37  
38  
39  
40  
41  
42  
43  
44  
45  
46  
47  
48  
49  
50  
51  
52  
53  
54  
55  
56  
57  
58  
59  
60

Table 1. BMI Misclassification among US Adults aged over 40 or older who are Normal weight and Overweight Stratified by BMI and %BF (Unweighted N=9,790 and Weighted N=101,098,270)

| Group | BMI (kg/m <sup>2</sup> )                  | %BF  | Proportion (%) |
|-------|-------------------------------------------|------|----------------|
| 1     | Normal (18.5-24.9 kg/m <sup>2</sup> )     | Low  | 36.3           |
| 2     |                                           | High | 63.7           |
| 3     | Overweight (25.0-29.9 kg/m <sup>2</sup> ) | Low  | 9.0            |
| 4     |                                           | High | 91.0           |

For peer review only



Table 2. Baseline characteristics of adults aged over 40 or older who are normal weight and overweight (Unweighted N=9,790 and Weighted N=101,098,270)

| Body Mass Index                 | Normal |         | Overweight |         | p-value |
|---------------------------------|--------|---------|------------|---------|---------|
| % of Body Fat                   | Low    | High    | Low        | High    |         |
| Weighted Sample size            | 812522 | 2248425 | 312588     | 6105346 |         |
| Prevalence of Abnormal Glucose  | 8.6    | 13.5    | 10.5       | 20.0    | <.00    |
| Age                             |        |         |            |         |         |
| 40 to 70                        | 92.3   | 81.1    | 96.0       | 85.2    | <.00    |
| 71 or older                     | 7.7    | 18.9    | 4.0        | 14.8    |         |
| Sex                             |        |         |            |         |         |
| Men                             | 61.1   | 28.8    | 96.2       | 53.4    | <.00    |
| Women                           | 38.9   | 71.2    | 3.8        | 46.6    |         |
| Race                            |        |         |            |         |         |
| Non-Hispanic White              | 77.7   | 80.4    | 70.4       | 77.0    | <.00    |
| Non-Hispanic Black              | 8.2    | 4.8     | 17.0       | 8.0     |         |
| Hispanics                       | 9.1    | 7.1     | 10.0       | 10.9    |         |
| Others                          | 4.3    | 7.7     | 2.6        | 4.2     |         |
| First Degree Relative Diabetes  |        |         |            |         |         |
| Yes                             | 35.9   | 45.5    | 43.6       | 46.9    | <.00    |
| No                              | 64.2   | 54.5    | 56.4       | 53.1    |         |
| Vigorous Activity               |        |         |            |         |         |
| Yes                             | 41.7   | 28.1    | 45.9       | 30.4    | <.00    |
| No                              | 58.3   | 71.9    | 54.1       | 69.6    |         |
| Muscle Strengthening Activities |        |         |            |         |         |
| Yes                             | 40.5   | 25.1    | 38.1       | 23.4    | <.00    |
| No                              | 59.5   | 74.9    | 61.9       | 76.7    |         |

Table 3. Odds Ratios (95% Confidence Intervals) for the Abnormal Glucose for Adults with Normal Weight and Overweight in Unadjusted and Adjusted Models controlling for age, sex, race/ethnicity, first degree relative diabetes, vigorous activities, and muscle strengthening activity

| BMI                                    | %BF  | Unadjusted OR     | Adjusted OR       |
|----------------------------------------|------|-------------------|-------------------|
| Normal (18.5-24.9kg/m <sup>2</sup> )   | Low  | 1.00              | 1.00              |
|                                        | High | 1.66 (1.13-2.43)* | 1.55 (1.01-2.38)* |
| Overweight (25-29.9kg/m <sup>2</sup> ) | Low  | 1.25 (0.75-2.07)  | 1.17 (0.69-1.98)  |
|                                        | High | 2.64 (1.86-3.76)* | 2.45 (1.61-3.71)* |

\* statistically significant at .05

**STROBE 2007 (v4) Statement—Checklist of items that should be included in reports of *cross-sectional studies***

| Section/Topic             | Item # | Recommendation                                                                                                                                                                       | Reported on page # |
|---------------------------|--------|--------------------------------------------------------------------------------------------------------------------------------------------------------------------------------------|--------------------|
| Title and abstract        | 1      | (a) Indicate the study’s design with a commonly used term in the title or the abstract                                                                                               | 2                  |
|                           |        | (b) Provide in the abstract an informative and balanced summary of what was done and what was found                                                                                  | 2                  |
| <b>Introduction</b>       |        |                                                                                                                                                                                      |                    |
| Background/rationale      | 2      | Explain the scientific background and rationale for the investigation being reported                                                                                                 | 4                  |
| Objectives                | 3      | State specific objectives, including any prespecified hypotheses                                                                                                                     | 5                  |
| <b>Methods</b>            |        |                                                                                                                                                                                      |                    |
| Study design              | 4      | Present key elements of study design early in the paper                                                                                                                              | 5                  |
| Setting                   | 5      | Describe the setting, locations, and relevant dates, including periods of recruitment, exposure, follow-up, and data collection                                                      | 5                  |
| Participants              | 6      | (a) Give the eligibility criteria, and the sources and methods of selection of participants                                                                                          | 6                  |
| Variables                 | 7      | Clearly define all outcomes, exposures, predictors, potential confounders, and effect modifiers. Give diagnostic criteria, if applicable                                             | 6-7                |
| Data sources/ measurement | 8*     | For each variable of interest, give sources of data and details of methods of assessment (measurement). Describe comparability of assessment methods if there is more than one group | 5-7                |
| Bias                      | 9      | Describe any efforts to address potential sources of bias                                                                                                                            |                    |
| Study size                | 10     | Explain how the study size was arrived at                                                                                                                                            | 7                  |
| Quantitative variables    | 11     | Explain how quantitative variables were handled in the analyses. If applicable, describe which groupings were chosen and why                                                         | 6-7                |
| Statistical methods       | 12     | (a) Describe all statistical methods, including those used to control for confounding                                                                                                | 7                  |
|                           |        | (b) Describe any methods used to examine subgroups and interactions                                                                                                                  |                    |
|                           |        | (c) Explain how missing data were addressed                                                                                                                                          |                    |
|                           |        | (d) If applicable, describe analytical methods taking account of sampling strategy                                                                                                   | 7                  |
|                           |        | (e) Describe any sensitivity analyses                                                                                                                                                |                    |
| <b>Results</b>            |        |                                                                                                                                                                                      |                    |

|                          |     |                                                                                                                                                                                                              |       |
|--------------------------|-----|--------------------------------------------------------------------------------------------------------------------------------------------------------------------------------------------------------------|-------|
| Participants             | 13* | (a) Report numbers of individuals at each stage of study—eg numbers potentially eligible, examined for eligibility, confirmed eligible, included in the study, completing follow-up, and analysed            | 6     |
|                          |     | (b) Give reasons for non-participation at each stage                                                                                                                                                         | 6     |
|                          |     | (c) Consider use of a flow diagram                                                                                                                                                                           |       |
| Descriptive data         | 14* | (a) Give characteristics of study participants (eg demographic, clinical, social) and information on exposures and potential confounders                                                                     | 7, 15 |
|                          |     | (b) Indicate number of participants with missing data for each variable of interest                                                                                                                          |       |
| Outcome data             | 15* | Report numbers of outcome events or summary measures                                                                                                                                                         | 7, 16 |
| Main results             | 16  | (a) Give unadjusted estimates and, if applicable, confounder-adjusted estimates and their precision (eg, 95% confidence interval). Make clear which confounders were adjusted for and why they were included | 7-8   |
|                          |     | (b) Report category boundaries when continuous variables were categorized                                                                                                                                    | 7     |
|                          |     | (c) If relevant, consider translating estimates of relative risk into absolute risk for a meaningful time period                                                                                             |       |
| Other analyses           | 17  | Report other analyses done—eg analyses of subgroups and interactions, and sensitivity analyses                                                                                                               |       |
| <b>Discussion</b>        |     |                                                                                                                                                                                                              |       |
| Key results              | 18  | Summarise key results with reference to study objectives                                                                                                                                                     | 8     |
| Limitations              | 19  | Discuss limitations of the study, taking into account sources of potential bias or imprecision. Discuss both direction and magnitude of any potential bias                                                   | 9     |
| Interpretation           | 20  | Give a cautious overall interpretation of results considering objectives, limitations, multiplicity of analyses, results from similar studies, and other relevant evidence                                   | 8,9   |
| Generalisability         | 21  | Discuss the generalisability (external validity) of the study results                                                                                                                                        | 8     |
| <b>Other information</b> |     |                                                                                                                                                                                                              |       |
| Funding                  | 22  | Give the source of funding and the role of the funders for the present study and, if applicable, for the original study on which the present article is based                                                | 10    |

\*Give information separately for cases and controls in case-control studies and, if applicable, for exposed and unexposed groups in cohort and cross-sectional studies.

**Note:** An Explanation and Elaboration article discusses each checklist item and gives methodological background and published examples of transparent reporting. The STROBE checklist is best used in conjunction with this article (freely available on the Web sites of PLoS Medicine at <http://www.plosmedicine.org/>, Annals of Internal Medicine at <http://www.annals.org/>, and Epidemiology at <http://www.epidem.com/>). Information on the STROBE Initiative is available at [www.strobe-statement.org](http://www.strobe-statement.org).

# BMJ Open

## The informational value of percent body fat with body mass index for the risk of abnormal blood glucose

|                                 |                                                                                                                                                                                |
|---------------------------------|--------------------------------------------------------------------------------------------------------------------------------------------------------------------------------|
| Journal:                        | <i>BMJ Open</i>                                                                                                                                                                |
| Manuscript ID                   | bmjopen-2017-019200.R1                                                                                                                                                         |
| Article Type:                   | Research                                                                                                                                                                       |
| Date Submitted by the Author:   | 16-Jan-2018                                                                                                                                                                    |
| Complete List of Authors:       | Jo, Ara; University of Florida, Health Services Research, Management and Policy;<br>Mainous III, Arch; University of Florida, Health Services Research, Management, and Policy |
| <b>Primary Subject Heading</b>: | Diabetes and endocrinology                                                                                                                                                     |
| Secondary Subject Heading:      | Epidemiology                                                                                                                                                                   |
| Keywords:                       | PREVENTIVE MEDICINE, General diabetes < DIABETES & ENDOCRINOLOGY, EPIDEMIOLOGY, PUBLIC HEALTH                                                                                  |
|                                 |                                                                                                                                                                                |

SCHOLARONE™  
Manuscripts

Peer Review Only

1  
2  
3 The informational value of percent body fat with body mass index for the risk of abnormal blood  
4 glucose  
5

6  
7 Ara Jo, PhD <sup>1</sup>, Arch G. Mainous III, PhD <sup>1,2</sup>  
8  
9

10  
11 1. Department of Health Services Research, Management and Policy, College of Public Health  
12 and Health Professions, University of Florida, Gainesville, Florida  
13

14 2. Department of Family Medicine and Community Health, College of Medicine, University of  
15 Florida, Gainesville, Florida  
16  
17

18  
19  
20 Corresponding Author:  
21

22 Ara Jo  
23

24 Department of Health Services Research, Management and Policy  
25

26 University of Florida  
27

28 Health Sciences Center, PO Box 100195  
29

30 Gainesville, FL 32610 USA  
31

32 Phone: 352-273-6073  
33

34 Fax: 352-273-6075  
35

36 Email: [ara13j@ufl.edu](mailto:ara13j@ufl.edu)  
37  
38

39 Source of support: None.  
40

41 Word Count: 2,977  
42

43 Number of Tables: 3  
44

45 Number of Figure: 1  
46

47 Conflict of Interest: The authors have no conflicts to declare.  
48  
49  
50  
51  
52  
53  
54  
55  
56  
57  
58  
59  
60

## ABSTRACT

Objective: To examine the value of percent body fat (%BF) with BMI to assess the risk of abnormal blood glucose (ABG) among US adults who are normal weight or overweight. We hypothesized that normal weight population with higher %BF is more likely to have ABG.

Design: A cross-sectional study.

Setting: National Health and Nutritional Examination Survey (NHANES), 1999–2006, conducted by the National Center for Health Statistics of the Centers for Disease Control and Prevention.

Participants: Participants were US adults aged 40 and older who have never been diagnosed with type 2 diabetes by a doctor (unweighted N=6335, weighted N=65705694). The study population was classified into four groups: 1) normal weight with normal %BF, 2) normal weight with high %BF, 3) overweight with normal %BF and 4) overweight with high %BF.

Main outcome measures: Odds ratios for ABG including prediabetes and undiagnosed diabetes ( $HbA1c \geq 5.7\%$ ,  $\geq 39$  mmol/mol).

Results: 64% of normal weight population with high %BF were misclassified as normal.

Prevalence of ABG in normal weight group with high %BF (13.5%) is significantly higher than the overweight group with lower %BF ( $p < .001$ ). In an unadjusted model, the odds ratio of ABG was significantly greater in adults at normal BMI with high %BF compared to individuals at normal weight with lower %BF. In an adjusted model controlling for age, sex, race/ethnicity, first degree of relative diabetes, vigorous-intensity activities and muscle strengthening activities, risks of ABG were greater in population with normal weight and high %BF and with overweight and low %BF (OR, 1.55, 95% CI, 1.01-2.38,  $p < .05$  vs. OR, 1.17, 95% CI, 0.69-1.98).

Conclusions: Integrating BMI with %BF can improve in classification to direct screening and prevention efforts to a group currently considered healthy and avoid penalties and stigmatization of other groups that are misclassified as unhealthy.

Keywords: abnormal glucose, diabetes prevention, percent body fat, body mass index

### Strengths and limitations of this study

- The study used population-based nationally representative data allowing for generalizability.
- We used the most accurate body composition measurement, DXA to assess direct impact of excessive body fat on abnormal blood glucose.
- Percent body fat integrating with BMI improved classification of population who has excessive body fat associated with high risk of abnormal blood glucose.
- The data is relatively old while it is the most recent data including whole body DXA measurement.
- There is no gold standard cut off points in defining obesity according to percent body fat.



## Introduction

Diabetes has become a worldwide epidemic. It is one of leading causes of morbidity and mortality in the US and its prevalence has been steadily increasing (1, 2). The prevalence of diagnosed diabetes reached to 12.3% of US adults in 2011-2012 (1). Furthermore, the total direct medical costs for diabetes was \$176 billion in 2012 and health care expenditure for people with diabetes is more than 2 times higher than people without diabetes (3).

In an effort to prevent diabetes and identify patients with undiagnosed diabetes for potential treatment, the United States Preventive Services Task Force (USPSTF) recommends screening of abnormal blood glucose (prediabetes or undiagnosed diabetes) for asymptomatic adults (4, 5). The USPSTF recommends screening adults aged between 40 years old and 70 years old only if they are overweight or obese defined by body mass index (BMI) cutoffs (4). Recently, the Equal Employment Opportunity Commission (EEOC) proposed the rule that if employees who are overweight or obese fail to achieve a normal weight ( $18.5\text{-}24.9\text{kg/m}^2$ ) through wellness programs, they penalize the employees who participate into wellness program up to 30% of the total costs of health insurance (6). Consequently, BMI levels have substantial implications for defining someone as healthy or unhealthy.

BMI which is widely adopted to assess obesity-related risk in clinical setting, however, may misclassify some segments of the general population who are at metabolic risk. While BMI is a simple equation based on height and weight, body weight that includes not only body fat but also muscle, bone and body water (7). Recent studies found that half of people who were obese according to percent body fat (%BF) but were classified as normal weight defined by BMI, and about 18% of adults with excessive %BF who were misclassified as not being obese showed a significant higher prevalence of metabolic syndrome (8, 9). Recent data indicates that a significant proportion of people with a normal weight designated by BMI ( $18.5\text{-}24.9\text{ kg/m}^2$ ) have prediabetes, undiagnosed diabetes and hypertension (10-12). In fact, 33% of adults 45 years old and older at a normal weight have prediabetes. Moreover, a normal weight obesity (NWO) which represents an individual who fall into normal range of BMI and who have excessive body fat mass is associated with higher risk of metabolic syndrome, cardiometabolic dysregulation and cardiovascular mortality (13, 16). On the other hand, professional football players who are

1  
2  
3 typically classified as being obese due to high muscle mass actually showed better  
4 cardiovascular health compared to the general population (17).  
5  
6

7 Because of the possible deleterious consequences due to BMI misclassification, percent  
8 body fat (%BF) may have some value as an addition to BMI to improve classification of  
9 individuals as healthy or unhealthy in terms of abnormal blood glucose (14, 15, 18). However,  
10 the extent to which adding %BF to BMI improves classification of risk is unclear. There has  
11 been little investigation to determine the incremental value of combining BMI and %BF in a risk  
12 assessment for abnormal blood glucose. Therefore, the purpose of this study is to examine in a  
13 nationally representative sample the value of %BF with BMI to assess the risk of abnormal  
14 glucose among adults who are normal weight or overweight and improve classification.  
15  
16  
17  
18  
19  
20  
21

## 22 Methods

23  
24 We analyzed the nationally representative, National Health and Nutrition Examination  
25 Survey (NHANES) for the years of 1999-2006. Although there are more recent NHANES data,  
26 this is the most recent data with a whole body Dual-energy X-ray Absorptiometry (DXA) which  
27 measures %BF. The NHANES is a national representative survey of noninstitutionalized US  
28 population using a complex stratified multistage probability cluster sample design. To account  
29 for nationally representative population estimates, the National Center for Health Statistics  
30 (NCHS) applies a multilevel weighting system. The survey included a standardized medical  
31 examination including blood and urine analysis for examining biomarkers and a number of  
32 health-related interviews. The current study was approved as exempt by the Institutional Review  
33 Board (IRB) at the University of Florida.  
34  
35  
36  
37  
38  
39  
40  
41

## 42 Anthropometric Assessment

43  
44 BMI was obtained from body weight divided by height squared ( $\text{kg}/\text{m}^2$ ). Weight and  
45 height were measured by a trained examiner in the mobile examination center and these were  
46 used to calculate BMI (19). BMI values were categorized into four groups (i.e., underweight,  
47 normal weight, overweight and obesity) on the basis of WHO guideline (7). Percent body fat  
48 (%BF) was derived from 1-3 times weekly measured whole body DXA scan (Hologic, Inc.,  
49 Bedford, Massachusetts) (20). A sex-specific threshold of %BF was adopted as 25% for men and  
50 35% for women given by the WHO guideline (Obesity in men  $\geq 25\%$  and women  $\geq 35\%$ ) (7).  
51  
52  
53  
54  
55  
56  
57

## Participants

The current study focused on adults aged over 40 years old or older who have never been told by a doctor or a health professional that they have diabetes (unweighted n=6,335). We focused on individuals 40 years old and older since 40 years old is the lower age cutoff for screening for abnormal blood glucose as suggested by the USPSTF(4). The study population was individuals with normal weight or overweight as defined by BMI. We limited the study to these individuals because they were the groups most likely to potentially be reclassified by the addition of %BF to BMI.

Participants were limited to normal weight and overweight population (18.5-29.9 kg/m<sup>2</sup>) and classified into four groups based on combined BMI and %BF. Respondents who were underweight and obesity defined by BMI were excluded (missing N=5,744). In normal BMI (18.5-24.9 kg/m<sup>2</sup>), the first group who had normal BMI and low %BF would be assessed to be at low risk. The second group may be misclassified as healthy even though existing data suggests a substantial population have prediabetes (normal BMI but high %BF) (12). Among individuals classified as overweight by BMI (25-29.9 kg/m<sup>2</sup>), the third group may be misclassified as unhealthy, but they may be healthy due to the BMI limitation of not appropriately assessing extensive muscle mass (overweight and low %BF). The fourth group would be at high risk based on having excessive fat (overweight and high %BF). Pregnant women who were not allowed to test the DXA examination were excluded. Also we excluded the obese population because of the known high risk.

## Outcomes

The primary outcome is an abnormal glucose including prediabetes or undiagnosed diabetes, an HbA1c level of 5.7% or higher ( $\geq 39$ mmol/mol). All subjects reported never having been told by a doctor or a health professional that they had prediabetes or diabetes (5). We excluded individuals with an HbA1c of 4.0% ( $\leq 20$  mmol/mol) that is associated with increased mortality without diabetes (21).

## Covariates

1  
2  
3 Age was classified into two groups with cut offs of 40 years old and 71 years old.  
4  
5 Race/ethnicity was categorized into four groups, 1) Non-Hispanic White, 2) Non-Hispanic  
6  
7 Black, 3) Hispanics and 4) Other. Family history is a predictor of diabetes according to  
8  
9 preliminary study (22). Thus we selected family history of diabetes representing a first degree of  
10  
11 relative ever being told by a health professional that they had diabetes.

12  
13 We also assessed physical activity. Intense activity helps to increase muscle mass and  
14  
15 reduce body fat and it may result in overweight despite low %BF. Also physical activity  
16  
17 represents a lifestyle intervention to control blood glucose. Vigorous activity was defined as  
18  
19 reports of an activity that causes a slight to moderate increase in breathing or heart rate for at  
20  
21 least 10 minutes over the past 30 days. Muscle strengthening activity refers to any physical  
22  
23 activities designed to strengthen muscles including lifting weights, push-ups or sit-ups over the  
24  
25 past 30 days.

## 26 Statistical Analysis

27  
28 To account for the stratified multistage probability sample design, we used SAS 9.4  
29  
30 (Cary, NC) and SUDAAN software (RTI, NC) for data analyses. Weighting and design variables  
31  
32 applied to all analyses from univariate analyses, chi-square tests and logistic regression models.  
33  
34 They allow us to estimate population estimates for noninstitutionalized US population. We  
35  
36 examined bivariate relationship between combined BMI/%BF and abnormal glucose. Following  
37  
38 by, both unadjusted and adjusted logistic regressions controlling for age, sex, race/ethnicity,  
39  
40 family history of diabetes, vigorous activity and muscle strengthening activity was employed to  
41  
42 assess likelihood of having abnormal blood glucose.

## 43 Results

44  
45 The total unweighted sample size was 6,335 US adults representing 65,705,694 adults in  
46  
47 the US population. No variable had more than 3% unweighted missing data and none of the  
48  
49 demographics had any missing data. It is important to note that the population estimates are  
50  
51 based on weighted sample. Table 1 showed that among normal weight population, approximately  
52  
53 64% of the normal weight population were misclassified as normal despite a high level of %BF.  
54  
55 Prevalence of abnormal glucose by combined BMI and %BF is shown in Table 2. Prevalence of  
56  
57 abnormal blood glucose in the normal weight group with high %BF (13.5%) is significantly

1  
2  
3 higher than the overweight group with lower %BF (10.5%) ( $p<.001$ ). About 78% of the study  
4 population was adults aged between 40 years old to 70 years old and Non-Hispanic White. In  
5 sex, most men showed low %BF whereas more than 70% of women has a high level of a body  
6 fat within normal weight population. Regardless of BMI, more than 40% of the study population  
7 with low %BF performed vigorous-intensity activity as well as muscle strengthening activity  
8 compared to population with high %BF ( $p<.001$ ).  
9

10  
11  
12  
13  
14 In an unadjusted logistic regression, the odds ratio of abnormal glucose was significantly  
15 greater in adults at normal weight with high %BF compared to individuals at normal weight with  
16 low %BF as the reference group (Table 3). Conversely, abnormal blood glucose risk was not  
17 significantly more likely in overweight adults with low %BF when compared to the normal  
18 weight/low %BF group. In an adjusted model controlling for age, sex, race/ethnicity, first degree  
19 of relative diabetes, vigorous-intensity activities and muscle strengthening activities, the adjusted  
20 model results were similar to the unadjusted results. Risks of abnormal blood glucose were  
21 greater in population with normal weight and high %BF as well as the overweight with high  
22 %BF (Table 3).  
23  
24  
25  
26  
27  
28  
29

30  
31 In sensitivity analyses, Area Under the Curve (AUC) of combined form of BMI and %BF  
32 was larger than areas of BMI only or %BF only (Figure 1). These areas were significantly  
33 different ( $p<.001$ ).  
34  
35

## 36 Discussion

37  
38  
39 The use of BMI only may misclassify segments of the adult population in terms of  
40 abnormal glucose. Our key findings showed that individuals with normal weight who have  
41 excessive percent body fat (%BF) have significantly higher risk of abnormal glucose compared  
42 with individuals with normal weight and low %BF. Conversely, of individuals with overweight,  
43 low %BF is not significantly associated with the risk of abnormal glucose. The results suggest  
44 that %BF combined with BMI may help to improve risk stratification for abnormal blood  
45 glucose in these intermediate groups.  
46  
47  
48  
49  
50

51  
52 Since body weight comprises not only fat but also a variety of body compositions such as  
53 muscle, organs and body water, it may not estimate actual amount of body fat. Professional  
54 football players who are typically classified as obesity due to high muscle mass showed better  
55  
56  
57

1  
2  
3 cardiovascular health compared to general population (17). In addition, among military  
4 population, whereas an average of BMI was overweight, almost half of them had never had any  
5 form of sickness absence (23). Furthermore, since according to our preliminary study, 33% of  
6 normal weight population has prediabetes, %BF may identify this normal weight population at  
7 risk of development of ABG (11). These evidences indicate that %BF may be a key factor in  
8 improving to estimate risk of chronic disease.  
9

10  
11  
12  
13  
14 Our key findings may suggest refinement of current clinical guidelines with additional  
15 body composition assessments. The USPSTF and the American Diabetes Association (ADA)  
16 have BMI as a key component of recommendations for diabetes prevention (4, 5). There may be  
17 missed opportunities for screening, particularly for prediabetes. Regardless of BMI, people with  
18 high %BF were older, female and Non-Hispanic White. While the proportion of family history  
19 patients with a positive for diabetes was similar across four groups, physical activity was  
20 different among groups. It is particularly important, as shown in our findings, that we  
21 appropriately classify the overweight population with low %BF. This population has been  
22 neglected as being classified as a healthy population. Our finding showed that these individuals  
23 are significantly more likely to perform high-intensity physical activities compared to the normal  
24 weight population who had low %BF and this behavior may result in overweight. For instance,  
25 professional athletes or civil forces with higher muscle mass who are typically classified as  
26 obesity measured by BMI may fail to meet normal BMI criteria in recruitment screening (24). In  
27 addition, according to the rule offered by EEOC, employees who are classified as overweight or  
28 obesity with high muscle mass and lower body fat may get penalized (6). Our findings indicated  
29 that BMI may not be the optimal tool to assess health outcomes for employees and new rule of  
30 the EEOC should be modified to consider body fat instead of body weight. Using a concept of  
31 normal weight obesity has also an opportunity to better detect population at risk of abnormal  
32 blood glucose to receive appropriate prevention services. This strategy may detect more than  
33 303,000 US adults who are normal weight and who usually miss an opportunity to receive  
34 preventive care service on time due to the use of BMI only. To prevent these adverse events,  
35 more accurate body composition assessment may be required.  
36  
37  
38  
39  
40  
41  
42  
43  
44  
45  
46  
47  
48  
49  
50  
51  
52  
53  
54  
55  
56  
57  
58  
59  
60

1  
2  
3 A direction for future research might be to refine the cut points for %BF, particularly in a  
4 longitudinal cohort. Further, it may be important to consider some other variables that may  
5 confound the relationship between %BF and diabetes like poverty, smoking, and sleep (25, 26).  
6  
7

## 8 9 Limitations

10  
11 There are limitations to this study. First, there is no gold standard clinical cut point to  
12 indicate high or low percentage body fat. While numerous studies used a variety of sex-specific  
13 thresholds, sensitivity analysis has not been implemented yet. The current study however,  
14 adopted commonly used criteria as a way to promote generalizability and comparability to other  
15 studies. Second, although this is a study investigating the association between several  
16 physiological measures, the data is not the most recent NHANES and so population estimates  
17 may not totally represent the current US population. While there are more recent NHANES data,  
18 the data used in the study is the most recent data with a whole body DXA measurement. We felt  
19 that the validity of the DXA scan for %BF was a strength that outweighed the recent data  
20 collection. Third, our analyses were cross sectional and did not allow us to look at the  
21 downstream risks of individuals with normal weight obesity. However, our primary goal was to  
22 improve on BMI in the accuracy of screening guidelines for individuals with current abnormal  
23 blood glucose which thereby requires cross-sectional analyses. Lastly, the use of a DXA scan  
24 may be an economic burden in health care setting. While a DXA scan is the most accurate  
25 technique to measure body compositions, it is prohibitively expensive to use for the purpose of  
26 screening only. Current insurance company does not cover the use of DXA scan for the purpose  
27 of screening of chronic diseases. Bioelectrical Impedance Analysis (BIA) which assesses %BF  
28 may be a cost-effectiveness alternative for the purpose of ABG screening in primary care setting,  
29 while current study used the data measured by DXA scan.  
30  
31  
32  
33  
34  
35  
36  
37  
38  
39  
40  
41  
42  
43  
44

## 45 Conclusion

46  
47 BMI which is typically used to define normal weight or overweight in a clinical setting  
48 may misclassify populations in relation to abnormal blood glucose. Integrating BMI with %BF  
49 can help in classification to direct screening and prevention efforts to a group currently  
50 considered healthy and avoid penalties and stigmatization of other groups that are misclassified  
51 as unhealthy.  
52  
53  
54  
55  
56  
57

1  
2  
3 Acknowledgments

4  
5 Contributors:

6 Ara Jo, PhD led the entire research as the first author from writing the manuscript, analyzing the  
7 data and interpretation.  
8

9  
10 Dr. Arch G. Mainous III, PhD supervised the entire process of the research as a research mentor  
11 and contributed to writing the manuscript.  
12

13  
14  
15 Competing interests: None declared.  
16

17  
18 Funding statement: This research received no specific grant from any funding agency in the  
19 public, commercial or not-for-profit sectors.  
20  
21

22  
23  
24 Ethics approval: This study was approved as exempt by the Institutional Review Board at the  
25 University of Florida.  
26

27  
28  
29 Data sharing statement: Data are available through the National Health and Nutrition  
30 Examination Survey access from <https://www.cdc.gov/nchs/nhanes/index.htm>.  
31  
32



## Reference

1. Menke A, Casagrande S, Geiss L, Cowie CC. Prevalence of and Trends in Diabetes Among Adults in the United States, 1988-2012. *JAMA*. 2015;314(10):1021-9. Epub 2015/09/09.
2. Ma J, Ward EM, Siegel RL, Jemal A. Temporal Trends in Mortality in the United States, 1969-2013. *JAMA*. 2015;314(16):1731-9. Epub 2015/10/28.
3. ADA. Economic costs of diabetes in the US in 2012. *Diabetes care*. 2013;36(4):1033.
4. U.S. Preventive Services Task Force. US. Final Recommendation Statement: Healthful Diet and Physical Activity: Counseling Adults with High Risk for CVD. *US Preventive Services Task Force*, 2014.
5. ADA. Standards of Diabetes Care in Diabetes-2016. *Diabetes Care*. 2016;39(supplement 1):S1-S106.
6. EEOC. Questions and Answers about EEOC's Notice of Proposed Rulemaking on Employer Wellness Programs. US Equal Employment Opportunity Commission; Available from: [https://www.eeoc.gov/laws/regulations/qanda\\_nprm\\_wellness.cfm](https://www.eeoc.gov/laws/regulations/qanda_nprm_wellness.cfm).
7. WHO. Physical status: The use of and interpretation of anthropometry, *Report of a WHO Expert Committee*. 1995.
8. Okorodudu D, Jumean M, Montori VM, Romero-Corral A, Somers V, Erwin P, et al. Diagnostic performance of body mass index to identify obesity as defined by body adiposity: a systematic review and meta-analysis. *International Journal of Obesity*. 2010;34(5):791-9.
9. Peterson MD, Al Snih S, Stoddard J, Shekar A, Hurvitz EA. Obesity misclassification and the metabolic syndrome in adults with functional mobility impairments: Nutrition Examination Survey 2003–2006. *Preventive Medicine*. 2014;60:71-6.
10. Mainous AG, Tanner RJ, Anton SD, Jo A. Grip strength as a marker of hypertension and diabetes in healthy weight adults. *American journal of preventive medicine*. 2015;49(6):850-8.

- 1  
2  
3 11. Mainous AG, Tanner RJ, Anton SD, Jo A, Luetke MC. Physical Activity and Abnormal  
4 Blood Glucose Among Healthy Weight Adults. *American journal of preventive medicine*.  
5 2017.  
6  
7
- 8  
9 12. Mainous AG, Tanner RJ, Jo A, Anton SD. Prevalence of prediabetes and abdominal obesity  
10 among healthy-weight adults: 18-Year trend. *The Annals of Family Medicine*.  
11 2016;14(4):304-10.  
12  
13
- 14  
15 13. Marques-Vidal P, Pécoud A, Hayoz D, Paccaud F, Mooser V, Waeber G, et al. Prevalence of  
16 normal weight obesity in Switzerland: effect of various definitions. *European journal of*  
17 *nutrition*. 2008;47(5):251-7.  
18  
19
- 20  
21 14. Romero-Corral A, Somers VK, Sierra-Johnson J, Korenfeld Y, Boarin S, Korinek J, et al.  
22 Normal weight obesity: a risk factor for cardiometabolic dysregulation and cardiovascular  
23 mortality. *European heart journal*. 2009:ehp487.  
24  
25
- 26  
27 15. Shea J, King M, Yi Y, Gulliver W, Sun G. Body fat percentage is associated with  
28 cardiometabolic dysregulation in BMI-defined normal weight subjects. *Nutrition,*  
29 *Metabolism and Cardiovascular Diseases*. 2012;22(9):741-7.  
30  
31
- 32  
33 16. Oliveros E, Somers VK, Sochor O, Goel K, Lopez-Jimenez F. The concept of normal weight  
34 obesity. *Progress in cardiovascular diseases*. 2014;56(4):426-33.  
35  
36
- 37  
38 17. Tucker AM, Vogel RA, Lincoln AE, Dunn RE, Ahrensfield DC, Allen TW, et al. Prevalence  
39 of cardiovascular disease risk factors among National Football League players. *JAMA*.  
40 2009;301(20):2111-9. Epub 2009/05/28.  
41  
42
- 43  
44 18. Gallagher D, Heymsfield SB, Heo M, Jebb SA, Murgatroyd PR, Sakamoto Y. Healthy  
45 percentage body fat ranges: an approach for developing guidelines based on body mass  
46 index. *The American journal of clinical nutrition*. 2000;72(3):694-701.  
47  
48
- 49  
50 19. CDC. NHANES: Anthropometric Procedures Manual. January 2007.  
51  
52
- 53  
54 20. NHANES. Documentation, Codebook, and Frequencies: Dual-Energy X-ray Absortometry.  
55 January 2008.  
56  
57

- 1  
2  
3 21. Carson AP, Fox CS, McGuire DK, Levitan EB, Laclaustra M, Mann DM, et al. Low  
4 hemoglobin A1c and risk of all-cause mortality among US adults without diabetes.  
5 *Circulation: Cardiovascular Quality and Outcomes*. 2010;3(6):661-7.  
6  
7  
8  
9 22. von Eckardstein A, Schulte H, Assmann G. Risk for diabetes mellitus in middle-aged  
10 Caucasian male participants of the PROCAM study: implications for the definition of  
11 impaired fasting glucose by the American Diabetes Association. *The Journal of Clinical*  
12 *Endocrinology & Metabolism*. 2000 Sep 1;85(9):3101-8.  
13  
14  
15  
16  
17 23. Kyröläinen H, Häkkinen K, Kautiainen H, Santtila M, Pihlainen K, Häkkinen A. Physical  
18 fitness, BMI and sickness absence in male military personnel. *Occupational Medicine*.  
19 2008;58(4):251-6.  
20  
21  
22  
23 24. Prentice AM, Jebb SA. Beyond body mass index. *Obesity reviews*. 2001;2(3):141-7.  
24  
25  
26 25. Cappuccio FP, D'elia L, Strazzullo P, Miller MA. Quantity and quality of sleep and incidence  
27 of type 2 diabetes. *Diabetes care*. 2010 Feb 1;33(2):414-20.  
28  
29  
30 26. Cappuccio FP, Taggart FM, Kandala NB, Currie A, Peile E, Stranges S, Miller MA. Meta-  
31 analysis of short sleep duration and obesity in children and adults. *Sleep*. 2008 May 1;31(5):619-  
32 26.  
33  
34  
35  
36  
37  
38  
39  
40  
41  
42  
43  
44  
45  
46  
47  
48  
49  
50  
51  
52  
53  
54  
55  
56  
57  
58  
59  
60

Table 1. BMI Misclassification among US Adults aged over 40 or older who are Normal weight and Overweight Stratified by BMI and %BF (Unweighted N=6,335 and Weighted N=65,705,694)

|     |      | BMI (kg/m <sup>2</sup> )              |                                           |
|-----|------|---------------------------------------|-------------------------------------------|
|     |      | Normal (18.5-24.9 kg/m <sup>2</sup> ) | Overweight (25.0-29.9 kg/m <sup>2</sup> ) |
| %BF | Low  | 36.3                                  | 9.0                                       |
|     | High | 63.7                                  | 91.0                                      |

For peer review only

Table 2. Baseline characteristics of adults aged over 40 or older who are normal weight and overweight (Unweighted N=6,335 and Weighted N= 65,705,694)

| Body Mass Index                      | Normal   |          | Overweight |          | p-value |
|--------------------------------------|----------|----------|------------|----------|---------|
|                                      | Low      | High     | Low        | High     |         |
| % of Body Fat                        |          |          |            |          |         |
| Unweighted Sample Size               | 908      | 1679     | 327        | 3421     |         |
| Weighted Sample Size                 | 10259138 | 18020486 | 3382474    | 34043596 |         |
| Prevalence of Abnormal Blood Glucose | 8.6      | 13.5     | 10.5       | 20.0     | <.001   |
| Age                                  |          |          |            |          |         |
| 40 to 70                             | 92.3     | 81.1     | 96.0       | 85.2     | <.001   |
| 71 or older                          | 7.7      | 18.9     | 4.0        | 14.8     |         |
| Sex                                  |          |          |            |          |         |
| Men                                  | 61.1     | 28.8     | 96.2       | 53.4     | <.001   |
| Women                                | 38.9     | 71.2     | 3.8        | 46.6     |         |
| Race                                 |          |          |            |          |         |
| Non-Hispanic White                   | 77.5     | 80.4     | 70.4       | 77.0     | <.001   |
| Non-Hispanic Black                   | 11.7     | 4.8      | 17.0       | 8.0      |         |
| Hispanics                            | 6.5      | 7.1      | 10.0       | 10.9     |         |
| Others                               | 4.3      | 7.7      | 2.6        | 4.2      |         |
| First Degree Relative Diabetes       |          |          |            |          |         |
| Yes                                  | 35.9     | 45.5     | 43.6       | 46.9     | <.001   |
| No                                   | 64.2     | 54.5     | 56.4       | 53.1     |         |
| Vigorous Activity                    |          |          |            |          |         |
| Yes                                  | 41.7     | 28.1     | 45.9       | 30.4     | <.001   |
| No                                   | 58.3     | 71.9     | 54.1       | 69.6     |         |
| Muscle Strengthening Activities      |          |          |            |          |         |
| Yes                                  | 40.5     | 25.1     | 38.1       | 23.4     | <.001   |
| No                                   | 59.5     | 74.9     | 61.9       | 76.7     |         |

Table 3. Odds Ratios (95% Confidence Intervals) for the Abnormal Glucose for Adults with Normal Weight and Overweight in Unadjusted and Adjusted Models controlling for age, sex, race/ethnicity, first degree relative diabetes, vigorous activities, and muscle strengthening activity

| BMI                                    | %BF  | Unadjusted OR     | Adjusted OR       |
|----------------------------------------|------|-------------------|-------------------|
| Normal (18.5-24.9kg/m <sup>2</sup> )   | Low  | 1.00              | 1.00              |
|                                        | High | 1.66 (1.13-2.43)* | 1.55 (1.01-2.38)* |
| Overweight (25-29.9kg/m <sup>2</sup> ) | Low  | 1.25 (0.75-2.07)  | 1.17 (0.69-1.98)  |
|                                        | High | 2.64 (1.86-3.76)* | 2.45 (1.61-3.71)* |

\* statistically significant at .05

1  
2  
3 Figure 1. Comparisons of Receiver Operating Characteristic (ROC) curves among BMI only,  
4 %BF only and Combined form of BMI and %BF  
5

6  
7 Footnote.

8  
9 1-a. ROC curve for %BF only (AUC=.5342)  
10

11 1-b. ROC curve for BMI only (AUC=.5571)  
12

13 1-c. ROC curve for Combined form of %BF and BMI (AUC=0.5663)  
14  
15  
16  
17  
18  
19  
20  
21  
22  
23  
24  
25  
26  
27  
28  
29  
30  
31  
32  
33  
34  
35  
36  
37  
38  
39  
40  
41  
42  
43  
44  
45  
46  
47  
48  
49  
50  
51  
52  
53  
54  
55  
56  
57  
58  
59  
60

For peer review only

1  
2  
3  
4  
5  
6  
7  
8  
9  
10  
11  
12  
13  
14  
15  
16  
17  
18  
19  
20  
21  
22  
23  
24  
25  
26  
27  
28  
29  
30  
31  
32  
33  
34  
35  
36  
37  
38  
39  
40  
41  
42  
43  
44  
45  
46  
47  
48  
49  
50  
51  
52  
53  
54  
55  
56  
57  
58  
59  
60

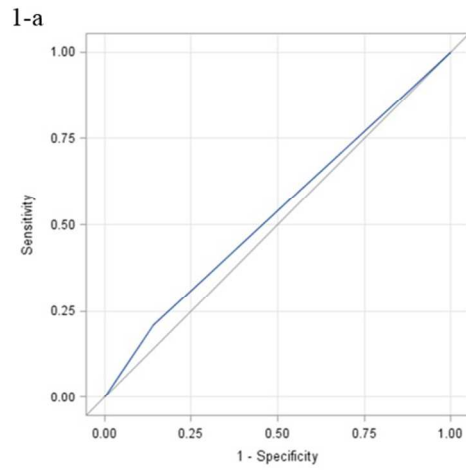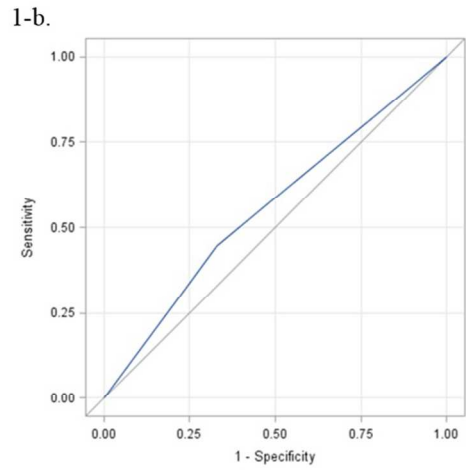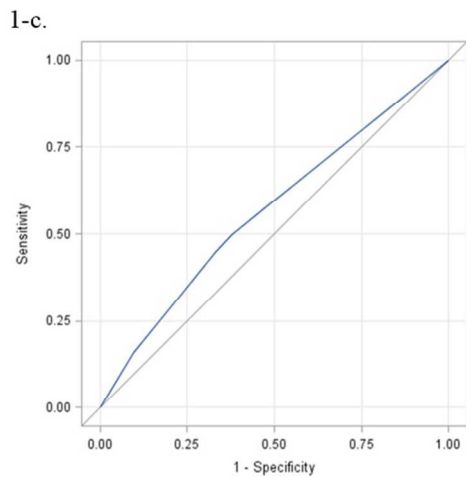

1-a. ROC curve for %BF only (AUC=.5342)  
1-b. ROC curve for BMI only (AUC=.5571)  
1-c. ROC curve for Combined form of %BF and BMI (AUC=0.5663)

89x88mm (300 x 300 DPI)



**STROBE 2007 (v4) Statement—Checklist of items that should be included in reports of *cross-sectional studies***

| Section/Topic                | Item # | Recommendation                                                                                                                                                                       | Reported on page # |
|------------------------------|--------|--------------------------------------------------------------------------------------------------------------------------------------------------------------------------------------|--------------------|
| <b>Title and abstract</b>    | 1      | (a) Indicate the study's design with a commonly used term in the title or the abstract                                                                                               | 2                  |
|                              |        | (b) Provide in the abstract an informative and balanced summary of what was done and what was found                                                                                  | 2                  |
| <b>Introduction</b>          |        |                                                                                                                                                                                      |                    |
| Background/rationale         | 2      | Explain the scientific background and rationale for the investigation being reported                                                                                                 | 4                  |
| Objectives                   | 3      | State specific objectives, including any prespecified hypotheses                                                                                                                     | 5                  |
| <b>Methods</b>               |        |                                                                                                                                                                                      |                    |
| Study design                 | 4      | Present key elements of study design early in the paper                                                                                                                              | 5                  |
| Setting                      | 5      | Describe the setting, locations, and relevant dates, including periods of recruitment, exposure, follow-up, and data collection                                                      | 5                  |
| Participants                 | 6      | (a) Give the eligibility criteria, and the sources and methods of selection of participants                                                                                          | 6                  |
| Variables                    | 7      | Clearly define all outcomes, exposures, predictors, potential confounders, and effect modifiers. Give diagnostic criteria, if applicable                                             | 6-7                |
| Data sources/<br>measurement | 8*     | For each variable of interest, give sources of data and details of methods of assessment (measurement). Describe comparability of assessment methods if there is more than one group | 5-7                |
| Bias                         | 9      | Describe any efforts to address potential sources of bias                                                                                                                            |                    |
| Study size                   | 10     | Explain how the study size was arrived at                                                                                                                                            | 7                  |
| Quantitative variables       | 11     | Explain how quantitative variables were handled in the analyses. If applicable, describe which groupings were chosen and why                                                         | 6-7                |
| Statistical methods          | 12     | (a) Describe all statistical methods, including those used to control for confounding                                                                                                | 7                  |
|                              |        | (b) Describe any methods used to examine subgroups and interactions                                                                                                                  |                    |
|                              |        | (c) Explain how missing data were addressed                                                                                                                                          |                    |
|                              |        | (d) If applicable, describe analytical methods taking account of sampling strategy                                                                                                   | 7                  |
|                              |        | (e) Describe any sensitivity analyses                                                                                                                                                |                    |
| <b>Results</b>               |        |                                                                                                                                                                                      |                    |

|                          |     |                                                                                                                                                                                                              |       |
|--------------------------|-----|--------------------------------------------------------------------------------------------------------------------------------------------------------------------------------------------------------------|-------|
| Participants             | 13* | (a) Report numbers of individuals at each stage of study—eg numbers potentially eligible, examined for eligibility, confirmed eligible, included in the study, completing follow-up, and analysed            | 6     |
|                          |     | (b) Give reasons for non-participation at each stage                                                                                                                                                         | 6     |
|                          |     | (c) Consider use of a flow diagram                                                                                                                                                                           |       |
| Descriptive data         | 14* | (a) Give characteristics of study participants (eg demographic, clinical, social) and information on exposures and potential confounders                                                                     | 7, 15 |
|                          |     | (b) Indicate number of participants with missing data for each variable of interest                                                                                                                          |       |
| Outcome data             | 15* | Report numbers of outcome events or summary measures                                                                                                                                                         | 7, 16 |
| Main results             | 16  | (a) Give unadjusted estimates and, if applicable, confounder-adjusted estimates and their precision (eg, 95% confidence interval). Make clear which confounders were adjusted for and why they were included | 7-8   |
|                          |     | (b) Report category boundaries when continuous variables were categorized                                                                                                                                    | 7     |
|                          |     | (c) If relevant, consider translating estimates of relative risk into absolute risk for a meaningful time period                                                                                             |       |
| Other analyses           | 17  | Report other analyses done—eg analyses of subgroups and interactions, and sensitivity analyses                                                                                                               |       |
| <b>Discussion</b>        |     |                                                                                                                                                                                                              |       |
| Key results              | 18  | Summarise key results with reference to study objectives                                                                                                                                                     | 8     |
| Limitations              | 19  | Discuss limitations of the study, taking into account sources of potential bias or imprecision. Discuss both direction and magnitude of any potential bias                                                   | 9     |
| Interpretation           | 20  | Give a cautious overall interpretation of results considering objectives, limitations, multiplicity of analyses, results from similar studies, and other relevant evidence                                   | 8,9   |
| Generalisability         | 21  | Discuss the generalisability (external validity) of the study results                                                                                                                                        | 8     |
| <b>Other information</b> |     |                                                                                                                                                                                                              |       |
| Funding                  | 22  | Give the source of funding and the role of the funders for the present study and, if applicable, for the original study on which the present article is based                                                | 10    |

\*Give information separately for cases and controls in case-control studies and, if applicable, for exposed and unexposed groups in cohort and cross-sectional studies.

**Note:** An Explanation and Elaboration article discusses each checklist item and gives methodological background and published examples of transparent reporting. The STROBE checklist is best used in conjunction with this article (freely available on the Web sites of PLoS Medicine at <http://www.plosmedicine.org/>, Annals of Internal Medicine at <http://www.annals.org/>, and Epidemiology at <http://www.epidem.com/>). Information on the STROBE Initiative is available at [www.strobe-statement.org](http://www.strobe-statement.org).

# BMJ Open

## The informational value of percent body fat with body mass index for the risk of abnormal blood glucose: a nationally representative cross-sectional study

|                                 |                                                                                                                                                                                |
|---------------------------------|--------------------------------------------------------------------------------------------------------------------------------------------------------------------------------|
| Journal:                        | <i>BMJ Open</i>                                                                                                                                                                |
| Manuscript ID                   | bmjopen-2017-019200.R2                                                                                                                                                         |
| Article Type:                   | Research                                                                                                                                                                       |
| Date Submitted by the Author:   | 09-Mar-2018                                                                                                                                                                    |
| Complete List of Authors:       | Jo, Ara; University of Florida, Health Services Research, Management and Policy;<br>Mainous III, Arch; University of Florida, Health Services Research, Management, and Policy |
| <b>Primary Subject Heading</b>: | Diabetes and endocrinology                                                                                                                                                     |
| Secondary Subject Heading:      | Epidemiology                                                                                                                                                                   |
| Keywords:                       | PREVENTIVE MEDICINE, General diabetes < DIABETES & ENDOCRINOLOGY, EPIDEMIOLOGY, PUBLIC HEALTH                                                                                  |
|                                 |                                                                                                                                                                                |

SCHOLARONE™  
Manuscripts

1  
2  
3 The informational value of percent body fat with body mass index for the risk of abnormal blood  
4 glucose: a nationally representative cross-sectional study

5  
6 Ara Jo, PhD<sup>1</sup>, Arch G. Mainous III, PhD<sup>1,2</sup>  
7  
8  
9

10 1. Department of Health Services Research, Management and Policy, College of Public Health  
11 and Health Professions, University of Florida, Gainesville, Florida

12  
13 2. Department of Family Medicine and Community Health, College of Medicine, University of  
14 Florida, Gainesville, Florida  
15  
16  
17  
18

19 Corresponding Author:

20 Ara Jo

21 Department of Health Services Research, Management and Policy

22 University of Florida

23 Health Sciences Center, PO Box 100195

24 Gainesville, FL 32610 USA

25 Phone: 352-273-6073

26 Fax: 352-273-6075

27 Email: [ara13j@ufl.edu](mailto:ara13j@ufl.edu)  
28  
29  
30  
31  
32  
33  
34  
35  
36  
37  
38  
39

40 Source of support: None.

41 Word Count: 2,632

42 Number of Tables: 3

43 Number of Figure: 1

44 Conflict of Interest: The authors have no conflicts to declare.  
45  
46  
47  
48  
49  
50  
51  
52  
53  
54  
55  
56  
57  
58  
59  
60

## ABSTRACT

Objective: To examine the value of percent body fat (%BF) with BMI to assess the risk of abnormal blood glucose (ABG) among US adults who are normal weight or overweight. We hypothesized that normal weight population with higher %BF is more likely to have ABG.

Design: A cross-sectional study.

Setting: National Health and Nutritional Examination Survey (NHANES), 1999–2006, conducted by the National Center for Health Statistics of the Centers for Disease Control and Prevention.

Participants: Participants were US adults aged 40 and older who have never been diagnosed with type 2 diabetes by a doctor (unweighted N=6335, weighted N=65705694). The study population was classified into four groups: 1) normal weight with normal %BF, 2) normal weight with high %BF, 3) overweight with normal %BF and 4) overweight with high %BF.

Main outcome measures: Odds ratios for ABG including prediabetes and undiagnosed diabetes ( $HbA1c \geq 5.7\%$ ,  $\geq 39$  mmol/mol).

Results: 64% of population with normal BMI classification, had a high %BF. Prevalence of ABG in normal weight group with high %BF (13.5%) is significantly higher than the overweight group with lower %BF (10.5%,  $p < .001$ ). In an unadjusted model, the odds ratio of ABG was significantly greater in adults at normal BMI with high %BF compared to individuals at normal weight with lower %BF. In an adjusted model controlling for age, sex, race/ethnicity, first degree of relative diabetes, vigorous-intensity activities and muscle strengthening activities, risks of ABG were greater in population with normal weight and high %BF (OR, 1.55, 95% CI, 1.01-2.38) and with overweight and low %BF (OR, 1.17, 95% CI, 0.69-1.98,  $p < .05$ ).

Conclusions: Integrating BMI with %BF can improve in classification to direct screening and prevention efforts to a group currently considered healthy and avoid penalties and stigmatization of other groups that are classified as high risk of ABG.

Keywords: abnormal glucose, diabetes prevention, percent body fat, body mass index

### Strengths and limitations of this study

- The study used population-based nationally representative data allowing for generalizability.
- We used the most accurate body composition measurement, DXA to assess direct impact of high body fat on abnormal blood glucose.
- Percent body fat integrating with BMI improved classification of population who has high body fat associated with high risk of abnormal blood glucose.
- The data is relatively old while it is the most recent data including whole body DXA measurement.
- There is no gold standard cut off points in defining obesity according to percent body fat.

## Introduction

Diabetes has become a worldwide epidemic. It is one of leading causes of morbidity and mortality in the US and its prevalence has been steadily increasing (1, 2). The prevalence of diagnosed diabetes reached to 12.3% of US adults in 2011-2012 (1). Furthermore, the total direct medical costs for diabetes was \$176 billion in 2012 and health care expenditure for people with diabetes is more than 2 times higher than people without diabetes (3).

In an effort to prevent diabetes and identify patients with undiagnosed diabetes for potential treatment, the United States Preventive Services Task Force (USPSTF) recommends screening of abnormal blood glucose (prediabetes or undiagnosed diabetes) for asymptomatic adults (4, 5). The USPSTF recommends screening adults aged between 40 years old and 70 years old only if they are overweight or obese defined by body mass index (BMI) cutoffs (4). Recently, the Equal Employment Opportunity Commission (EEOC) proposed the rule that if employees who are overweight or obese fail to achieve a normal weight ( $18.5-24.9\text{kg/m}^2$ ) through wellness programs, they penalize the employees who participate into wellness program up to 30% of the total costs of health insurance (6). Consequently, BMI levels have substantial implications for defining someone as low risk of ABG or high risk of ABG.

BMI which is widely adopted to assess obesity-related risk in clinical setting, however, may misclassify some segments of the general population who are at metabolic risk. While BMI is a simple equation based on height and weight, body weight that includes not only body fat but also muscle, bone and body water (7). Recent studies found that half of people who were obese according to percent body fat (%BF) but were classified as normal weight defined by BMI, and about 18% of adults with high %BF who were classified as not being obese showed a significant higher prevalence of metabolic syndrome (8, 9). Recent data indicates that a significant proportion of people with a normal weight designated by BMI ( $18.5-24.9\text{ kg/m}^2$ ) have prediabetes, undiagnosed diabetes and hypertension (10-12). In fact, 33% of adults 45 years old and older at a normal weight have prediabetes. Moreover, a normal weight obesity (NWO) which represents an individual who fall into normal range of BMI and who have high body fat mass is associated with higher risk of metabolic syndrome, cardiometabolic dysregulation and cardiovascular mortality (13, 16). On the other hand, professional football players who are

1  
2  
3 typically classified as being obese due to high muscle mass actually showed better  
4 cardiovascular health compared to the general population (17).  
5  
6

7  
8 Because of the possible deleterious consequences due to BMI misclassification, percent  
9 body fat (%BF) may have some value as an addition to BMI to improve classification of  
10 individuals as low risk of ABG or high risk of ABG (14, 15, 18). However, the extent to which  
11 adding %BF to BMI improves classification of risk is unclear. There has been little investigation  
12 to determine the incremental value of combining BMI and %BF in a risk assessment for  
13 abnormal blood glucose. Therefore, the purpose of this study is to examine in a nationally  
14 representative sample the value of %BF with BMI to assess the risk of abnormal glucose among  
15 adults who are normal weight or overweight and improve classification.  
16  
17  
18  
19  
20

## 21 22 Methods

23  
24 We analyzed the nationally representative, National Health and Nutrition Examination  
25 Survey (NHANES) for the years of 1999-2006. Although there are more recent NHANES data,  
26 this is the most recent data with a whole body Dual-energy X-ray Absorptiometry (DXA) which  
27 measures %BF. The NHANES is a national representative survey of noninstitutionalized US  
28 population using a complex stratified multistage probability cluster sample design. To account  
29 for nationally representative population estimates, the National Center for Health Statistics  
30 (NCHS) applies a multilevel weighting system. The survey included a standardized medical  
31 examination including blood and urine analysis for examining biomarkers and a number of  
32 health-related interviews. The current study was approved as exempt by the Institutional Review  
33 Board (IRB) at the University of Florida.  
34  
35  
36  
37  
38  
39  
40  
41

## 42 43 Anthropometric Assessment

44  
45 BMI was obtained from body weight divided by height squared ( $\text{kg}/\text{m}^2$ ). Weight and  
46 height were measured by a trained examiner in the mobile examination center and these were  
47 used to calculate BMI (19). BMI values were categorized into four groups (i.e., underweight,  
48 normal weight, overweight and obesity) on the basis of guideline of the American Association  
49 of Clinical Endocrinologists (AACE) and the American College of Endocrinology (ACE) (7).  
50 Percent body fat (%BF) was derived from 1-3 times weekly measured whole body DXA scan  
51 (Hologic, Inc., Bedford, Massachusetts) (20). A sex-specific threshold of %BF was adopted as  
52  
53  
54  
55  
56  
57



1  
2  
3 25% for men and 35% for women given by the AACE/ACE guideline (Obesity in men  $\geq 25\%$   
4 and women  $\geq 35\%$ ) (7).

## 5 6 7 Participants

8  
9  
10 The current study focused on adults aged over 40 years old or older who have never been  
11 told by a doctor or a health professional that they have diabetes (unweighted  $n=6,335$ ). We  
12 focused on individuals 40 years old and older since 40 years old is the lower age cutoff for  
13 screening for abnormal blood glucose as suggested by the USPSTF(4). The study population was  
14 individuals with normal weight or overweight as defined by BMI. We limited the study to these  
15 individuals because they were the groups most likely to potentially be classified by the addition  
16 of %BF to BMI.  
17  
18  
19  
20  
21  
22

23 Participants were limited to normal weight and overweight population ( $18.5-29.9 \text{ kg/m}^2$ )  
24 and classified as four groups based on combined BMI and %BF. Respondents who were  
25 underweight and obesity defined by BMI were excluded (missing  $N=5,744$ ). In normal BMI  
26 ( $18.5-24.9 \text{ kg/m}^2$ ), the first group who had normal BMI and low %BF would be assessed to be at  
27 low risk. The second group may be classified as low risk of ABG even though existing data  
28 suggests a substantial population have prediabetes (normal BMI but high %BF) (12). Among  
29 individuals classified as overweight by BMI ( $25-29.9 \text{ kg/m}^2$ ), the third group may be classified  
30 as high risk of ABG, but they may be healthy due to the BMI limitation of not appropriately  
31 assessing extensive muscle mass (overweight and low %BF). The fourth group would be at high  
32 risk based on having high fat (overweight and high %BF). Pregnant women who were not  
33 allowed to test the DXA examination were excluded. Also we excluded the obese population  
34 because of the known high risk.  
35  
36  
37  
38  
39  
40  
41  
42  
43

## 44 Outcomes

45  
46  
47 The primary outcome is an abnormal glucose including prediabetes or undiagnosed  
48 diabetes, an HbA1c level of 5.7% or higher ( $\geq 39 \text{ mmol/mol}$ ). All subjects reported never having  
49 been told by a doctor or a health professional that they had prediabetes or diabetes (5). We  
50 excluded individuals with an HbA1c of 4.0% ( $\leq 20 \text{ mmol/mol}$ ) that is associated with increased  
51 mortality without diabetes (21).  
52  
53  
54  
55  
56  
57

## Covariates

Age was classified into two groups with cut offs of 40 years old and 71 years old. Race/ethnicity was categorized into four groups, 1) Non-Hispanic White, 2) Non-Hispanic Black, 3) Hispanics and 4) Other. Family history is a predictor of diabetes according to preliminary study (22). Thus we selected family history of diabetes representing a first degree of relative ever being told by a health professional that they had diabetes.

We also assessed physical activity. Intense activity helps to increase muscle mass and reduce body fat and it may result in overweight despite low %BF. Also physical activity represents a lifestyle intervention to control blood glucose. Vigorous activity was defined as reports of an activity that causes a slight to moderate increase in breathing or heart rate for at least 10 minutes over the past 30 days. Muscle strengthening activity refers to any physical activities designed to strengthen muscles including lifting weights, push-ups or sit-ups over the past 30 days.

## Statistical Analysis

To account for the stratified multistage probability sample design, we used SAS 9.4 (Cary, NC) and SUDAAN software (RTI, NC) for data analyses. Weighting and design variables applied to all analyses from univariate analyses, chi-square tests and logistic regression models. They allow us to estimate population estimates for noninstitutionalized US population. We examined bivariate relationship between combined BMI/%BF and abnormal glucose. Following by, both unadjusted and adjusted logistic regressions controlling for age, sex, race/ethnicity, family history of diabetes, vigorous activity and muscle strengthening activity was employed to assess likelihood of having abnormal blood glucose.

## Patient and Public Involvement

Patients and/or public were not involved in this study.

## Results

The total unweighted sample size was 6,335 US adults representing 65,705,694 adults in the US population. No variable had more than 3% unweighted missing data and none of the

1  
2  
3 demographics had any missing data. It is important to note that the population estimates are  
4 based on weighted sample. Table 1 showed that among normal weight population, approximately  
5 64% of population of normal BMI classification had a high %BF. Prevalence of abnormal  
6 glucose by combined BMI and %BF is shown in Table 2. Prevalence of abnormal blood glucose  
7 in the normal weight group with high %BF (13.5%) is significantly higher than the overweight  
8 group with lower %BF (10.5%) ( $p<.001$ ). About 78% of the study population was adults aged  
9 between 40 years old to 70 years old and Non-Hispanic White. In sex, most men showed low  
10 %BF whereas more than 70% of women has a high level of a body fat within normal weight  
11 population. Regardless of BMI, more than 40% of the study population with low %BF performed  
12 vigorous-intensity activity as well as muscle strengthening activity compared to population with  
13 high %BF ( $p<.001$ ).  
14  
15  
16  
17  
18  
19  
20  
21  
22

23 In an unadjusted logistic regression, the odds ratio of abnormal glucose was significantly  
24 greater in adults at normal weight with high %BF compared to individuals at normal weight with  
25 low %BF as the reference group (Table 3). Conversely, abnormal blood glucose risk was not  
26 significantly more likely in overweight adults with low %BF when compared to the normal  
27 weight/low %BF group. In an adjusted model controlling for age, sex, race/ethnicity, first degree  
28 of relative diabetes, vigorous-intensity activities and muscle strengthening activities, the adjusted  
29 model results were similar to the unadjusted results. Risks of abnormal blood glucose were  
30 greater in population with normal weight and high %BF as well as the overweight with high  
31 %BF (Table 3).  
32  
33  
34  
35  
36  
37  
38

39 In sensitivity analyses, Area Under the Curve (AUC) of combined form of BMI and %BF  
40 was larger than areas of BMI only or %BF only (Figure 1). These areas were significantly  
41 different ( $p<.001$ ).  
42  
43  
44

## 45 Discussion

46  
47 The use of BMI only may misclassify segments of the adult population in terms of risk of  
48 abnormal glucose. Our key findings showed that individuals with normal weight who have high  
49 percent body fat (%BF) have significantly higher risk of abnormal glucose compared with  
50 individuals with normal weight and low %BF. Conversely, of individuals with overweight,  
51 low %BF is not significantly associated with the risk of abnormal glucose. The results suggest  
52  
53  
54  
55  
56  
57  
58  
59  
60

1  
2  
3 that %BF combined with BMI may help to improve risk stratification for abnormal blood  
4 glucose in these intermediate groups.  
5  
6

7 Since body weight comprises not only fat but also a variety of body compositions such as  
8 muscle, organs and body water, it may not estimate actual amount of body fat. Professional  
9 football players who are typically classified as obesity due to high muscle mass showed better  
10 cardiovascular health compared to general population (17). In addition, among military  
11 population, whereas an average of BMI was overweight, almost half of them had never had any  
12 form of sickness absence (23). Furthermore, since according to our preliminary study, 33% of  
13 normal weight population has prediabetes, %BF may identify this normal weight population at  
14 risk of development of ABG (11). These evidences indicate that %BF may be a key factor in  
15 improving to estimate risk of chronic disease.  
16  
17  
18  
19  
20  
21  
22  
23

24 Our key findings may suggest refinement of current clinical guidelines with additional  
25 body composition assessments. The USPSTF and the American Diabetes Association (ADA)  
26 have BMI as a key component of recommendations for diabetes prevention (4, 5). There may be  
27 missed opportunities for screening, particularly for prediabetes. Regardless of BMI, people with  
28 high %BF were older, female and Non-Hispanic White. While the proportion of family history  
29 patients with a positive for diabetes was similar across four groups, physical activity was  
30 different among groups. It is particularly important, as shown in our findings, that we  
31 appropriately classify the overweight population with low %BF. This population has been  
32 neglected as being classified as a healthy population. Our finding showed that these individuals  
33 are significantly more likely to perform high-intensity physical activities compared to the normal  
34 weight population who had low %BF and this behavior may result in overweight. For instance,  
35 professional athletes or civil forces with higher muscle mass who are typically classified as  
36 obesity measured by BMI may fail to meet normal BMI criteria in recruitment screening (24). In  
37 addition, according to the rule offered by EEOC, employees who are classified as overweight or  
38 obesity with high muscle mass and lower body fat may get penalized (6). Our findings indicated  
39 that BMI may not be the optimal tool to assess health outcomes for employees and new rule of  
40 the EEOC should be modified to consider body fat instead of body weight. Using a concept of  
41 normal weight obesity has also an opportunity to better detect population at risk of abnormal  
42 blood glucose to receive appropriate prevention services. This strategy may detect more than  
43  
44  
45  
46  
47  
48  
49  
50  
51  
52  
53  
54  
55  
56  
57  
58  
59  
60

1  
2  
3 303,000 US adults who are normal weight and who usually miss an opportunity to receive  
4 preventive care service on time due to the use of BMI only. To prevent these adverse events,  
5 more accurate body composition assessment may be required.  
6  
7

8  
9 A direction for future research might be to refine the cut points for %BF, particularly in a  
10 longitudinal cohort. Further, it may be important to consider some other variables that may  
11 confound the relationship between %BF and diabetes like poverty, diet quality, smoking, and  
12 sleep (25, 26). In particular, these variables may be important for future interventions.  
13  
14  
15

### 16 17 Limitations

18  
19 There are limitations to this study. First, there is no gold standard clinical cut point to  
20 indicate high or low percentage body fat. While numerous studies used a variety of sex-specific  
21 thresholds, sensitivity analysis has not been implemented yet. The current study however,  
22 adopted commonly used criteria as a way to promote generalizability and comparability to other  
23 studies. Second, although this is a study investigating the association between several  
24 physiological measures, the data is not the most recent NHANES and so population estimates  
25 may not totally represent the current US population. While there are more recent NHANES data,  
26 the data used in the study is the most recent data with a whole body DXA measurement. We felt  
27 that the validity of the DXA scan for %BF was a strength that outweighed the recent data  
28 collection. Third, our analyses were cross sectional and did not allow us to look at the  
29 downstream risks of individuals with normal weight obesity. However, our primary goal was to  
30 improve on BMI in the accuracy of screening guidelines for individuals with current abnormal  
31 blood glucose which thereby requires cross-sectional analyses. Lastly, the use of a DXA scan  
32 may be an economic burden in health care setting. While a DXA scan is the most accurate  
33 technique to measure body compositions, it is prohibitively expensive to use for the purpose of  
34 screening only. Current insurance company does not cover the use of DXA scan for the purpose  
35 of screening of chronic diseases. Bioelectrical Impedance Analysis (BIA) which assesses %BF  
36 may be a cost-effectiveness alternative for the purpose of ABG screening in primary care setting,  
37 while current study used the data measured by DXA scan.  
38  
39  
40  
41  
42  
43  
44  
45  
46  
47  
48  
49  
50  
51

### 52 53 Conclusion

1  
2  
3 BMI which is typically used to define normal weight or overweight in a clinical setting  
4 may misclassify populations in relation to abnormal blood glucose. Integrating BMI with %BF  
5 can help in classification to direct screening and prevention efforts to a group currently  
6 considered low risk of ABG and avoid penalties and stigmatization of other groups that are  
7 classified as high risk of ABG.  
8  
9  
10  
11  
12  
13  
14  
15  
16  
17  
18  
19  
20  
21  
22  
23  
24  
25  
26  
27  
28  
29  
30  
31  
32  
33  
34  
35  
36  
37  
38  
39  
40  
41  
42  
43  
44  
45  
46  
47  
48  
49  
50  
51  
52  
53  
54  
55  
56  
57  
58  
59  
60

For peer review only

1  
2  
3 Acknowledgments

4  
5 Contributors:

6 Ara Jo, PhD led the entire research as the first author from writing the manuscript, analyzing the  
7 data and interpretation.  
8

9  
10 Dr. Arch G. Mainous III, PhD supervised the entire process of the research as a research mentor  
11 and contributed to writing the manuscript.  
12

13  
14  
15 Competing interests: None declared.  
16

17  
18 Funding statement: This research received no specific grant from any funding agency in the  
19 public, commercial or not-for-profit sectors.  
20  
21

22  
23  
24 Ethics approval: This study was approved as exempt by the Institutional Review Board at the  
25 University of Florida.  
26

27  
28  
29 Data sharing statement: Data are available through the National Health and Nutrition  
30 Examination Survey access from <https://www.cdc.gov/nchs/nhanes/index.htm>.  
31  
32

## Reference

1. Menke A, Casagrande S, Geiss L, Cowie CC. Prevalence of and Trends in Diabetes Among Adults in the United States, 1988-2012. *JAMA*. 2015;314(10):1021-9. Epub 2015/09/09.
2. Ma J, Ward EM, Siegel RL, Jemal A. Temporal Trends in Mortality in the United States, 1969-2013. *JAMA*. 2015;314(16):1731-9. Epub 2015/10/28.
3. ADA. Economic costs of diabetes in the US in 2012. *Diabetes care*. 2013;36(4):1033.
4. U.S. Preventive Services Task Force. US. Final Recommendation Statement:Healthful Diet and Physical Activity: Counseling Adults with High Risk for CVD. *US Preventive Services Task Force*, 2014.
5. ADA. Standards of Diabetes Care in Diabetes-2016. *Diabetes Care*. 2016;39(supplement 1):S1-S106.
6. EEOC. Questions and Answers about EEOC's Notice of Proposed Rulemaking on Employer Wellness Programs. US Equal Employment Opportunity Commission; Available from: [https://www.eeoc.gov/laws/regulations/qanda\\_nprm\\_wellness.cfm](https://www.eeoc.gov/laws/regulations/qanda_nprm_wellness.cfm).
7. Dickey RA, Bartuska DG, Bray GW, Callaway CW, Davidson ET, Feld S, Ferraro RT, Hodgson SF, Jellinger PS, Kennedy FP, Lawrence AM. AACE/ACE Position statement on the prevention, diagnosis, and treatment of obesity (1998 revision). *Endocr Pract*. 1998 Sep;4(5):297-350..
8. Okorodudu D, Jumean M, Montori VM, Romero-Corral A, Somers V, Erwin P, et al. Diagnostic performance of body mass index to identify obesity as defined by body adiposity: a systematic review and meta-analysis. *International Journal of Obesity*. 2010;34(5):791-9.
9. Peterson MD, Al Snih S, Stoddard J, Shekar A, Hurvitz EA. Obesity misclassification and the metabolic syndrome in adults with functional mobility impairments: Nutrition Examination Survey 2003–2006. *Preventive Medicine*. 2014;60:71-6.



10. Mainous AG, Tanner RJ, Anton SD, Jo A. Grip strength as a marker of hypertension and diabetes in healthy weight adults. *American journal of preventive medicine*. 2015;49(6):850-8.
11. Mainous AG, Tanner RJ, Anton SD, Jo A, Luetke MC. Physical Activity and Abnormal Blood Glucose Among Healthy Weight Adults. *American journal of preventive medicine*. 2017.
12. Mainous AG, Tanner RJ, Jo A, Anton SD. Prevalence of prediabetes and abdominal obesity among healthy-weight adults: 18-Year trend. *The Annals of Family Medicine*. 2016;14(4):304-10.
13. Marques-Vidal P, Pécoud A, Hayoz D, Paccaud F, Mooser V, Waeber G, et al. Prevalence of normal weight obesity in Switzerland: effect of various definitions. *European journal of nutrition*. 2008;47(5):251-7.
14. Romero-Corral A, Somers VK, Sierra-Johnson J, Korenfeld Y, Boarin S, Korinek J, et al. Normal weight obesity: a risk factor for cardiometabolic dysregulation and cardiovascular mortality. *European heart journal*. 2009:ehp487.
15. Shea J, King M, Yi Y, Gulliver W, Sun G. Body fat percentage is associated with cardiometabolic dysregulation in BMI-defined normal weight subjects. *Nutrition, Metabolism and Cardiovascular Diseases*. 2012;22(9):741-7.
16. Oliveros E, Somers VK, Sochor O, Goel K, Lopez-Jimenez F. The concept of normal weight obesity. *Progress in cardiovascular diseases*. 2014;56(4):426-33.
17. Tucker AM, Vogel RA, Lincoln AE, Dunn RE, Ahrensfield DC, Allen TW, et al. Prevalence of cardiovascular disease risk factors among National Football League players. *JAMA*. 2009;301(20):2111-9. Epub 2009/05/28.
18. Gallagher D, Heymsfield SB, Heo M, Jebb SA, Murgatroyd PR, Sakamoto Y. Healthy percentage body fat ranges: an approach for developing guidelines based on body mass index. *The American journal of clinical nutrition*. 2000;72(3):694-701.

- 1  
2  
3 19. CDC. NHANES: Anthropometric Procedures Manual. January 2007.  
4
- 5  
6 20. NHANES. Documentation, Codebook, and Frequencies: Dual-Energy X-ray Absortometry.  
7  
8 January 2008.  
9
- 10  
11 21. Carson AP, Fox CS, McGuire DK, Levitan EB, Laclaustra M, Mann DM, et al. Low  
12 hemoglobin A1c and risk of all-cause mortality among US adults without diabetes.  
13  
14 *Circulation: Cardiovascular Quality and Outcomes*. 2010;3(6):661-7.  
15
- 16  
17 22. von Eckardstein A, Schulte H, Assmann G. Risk for diabetes mellitus in middle-aged  
18  
19 Caucasian male participants of the PROCAM study: implications for the definition of  
20  
21 impaired fasting glucose by the American Diabetes Association. *The Journal of Clinical*  
22  
23 *Endocrinology & Metabolism*. 2000 Sep 1;85(9):3101-8.  
24
- 25  
26 23. Kyröläinen H, Häkkinen K, Kautiainen H, Santtila M, Pihlainen K, Häkkinen A. Physical  
27  
28 fitness, BMI and sickness absence in male military personnel. *Occupational Medicine*.  
29  
30 2008;58(4):251-6.  
31
- 32  
33 24. Prentice AM, Jebb SA. Beyond body mass index. *Obesity reviews*. 2001;2(3):141-7.  
34
- 35  
36 25. Cappuccio FP, D'elia L, Strazzullo P, Miller MA. Quantity and quality of sleep and incidence  
37  
38 of type 2 diabetes. *Diabetes care*. 2010 Feb 1;33(2):414-20.  
39
- 40  
41 26. Cappuccio FP, Taggart FM, Kandala NB, Currie A, Peile E, Stranges S, Miller MA. Meta-  
42  
43 analysis of short sleep duration and obesity in children and adults. *Sleep*. 2008 May 1;31(5):619-  
44  
45  
46  
47  
48  
49  
50  
51  
52  
53  
54  
55  
56  
57  
58  
59  
60

Table 1. BMI Classification among US Adults aged over 40 or older who are Normal weight and Overweight Stratified by BMI and %BF (Unweighted N=6,335 and Weighted N=65,705,694)

|     |      | BMI (kg/m <sup>2</sup> )              |                                           |
|-----|------|---------------------------------------|-------------------------------------------|
|     |      | Normal (18.5-24.9 kg/m <sup>2</sup> ) | Overweight (25.0-29.9 kg/m <sup>2</sup> ) |
| %BF | Low  | 36.3                                  | 9.0                                       |
|     | High | 63.7                                  | 91.0                                      |

For peer review only

Table 2. Baseline characteristics of adults aged over 40 or older who are normal weight and overweight (Unweighted N=6,335 and Weighted N= 65,705,694)

| Body Mass Index                      | Normal   |          | Overweight |          | p-value |
|--------------------------------------|----------|----------|------------|----------|---------|
| % of Body Fat                        | Low      | High     | Low        | High     |         |
| Unweighted Sample Size               | 908      | 1679     | 327        | 3421     |         |
| Weighted Sample Size                 | 10259138 | 18020486 | 3382474    | 34043596 |         |
| Prevalence of Abnormal Blood Glucose | 8.6      | 13.5     | 10.5       | 20.0     | <.001   |
| Age                                  |          |          |            |          |         |
| 40 to 70                             | 92.3     | 81.1     | 96.0       | 85.2     | <.001   |
| 71 or older                          | 7.7      | 18.9     | 4.0        | 14.8     |         |
| Sex                                  |          |          |            |          |         |
| Men                                  | 61.1     | 28.8     | 96.2       | 53.4     | <.001   |
| Women                                | 38.9     | 71.2     | 3.8        | 46.6     |         |
| Race                                 |          |          |            |          |         |
| Non-Hispanic White                   | 77.5     | 80.4     | 70.4       | 77.0     | <.001   |
| Non-Hispanic Black                   | 11.7     | 4.8      | 17.0       | 8.0      |         |
| Hispanics                            | 6.5      | 7.1      | 10.0       | 10.9     |         |
| Others                               | 4.3      | 7.7      | 2.6        | 4.2      |         |
| First Degree Relative Diabetes       |          |          |            |          |         |
| Yes                                  | 35.9     | 45.5     | 43.6       | 46.9     | <.001   |
| No                                   | 64.2     | 54.5     | 56.4       | 53.1     |         |
| Vigorous Activity                    |          |          |            |          |         |
| Yes                                  | 41.7     | 28.1     | 45.9       | 30.4     | <.001   |
| No                                   | 58.3     | 71.9     | 54.1       | 69.6     |         |
| Muscle Strengthening Activities      |          |          |            |          |         |
| Yes                                  | 40.5     | 25.1     | 38.1       | 23.4     | <.001   |
| No                                   | 59.5     | 74.9     | 61.9       | 76.7     |         |

Table 3. Odds Ratios (95% Confidence Intervals) for the Abnormal Glucose for Adults with Normal Weight and Overweight in Unadjusted and Adjusted Logistic Regression Models controlling for age, sex, race/ethnicity, first degree relative diabetes, vigorous activities, and muscle strengthening activity

| BMI                                    | %BF  | Unadjusted OR     | Adjusted OR       |
|----------------------------------------|------|-------------------|-------------------|
| Normal (18.5-24.9kg/m <sup>2</sup> )   | Low  | 1.00              | 1.00              |
|                                        | High | 1.66 (1.13-2.43)* | 1.55 (1.01-2.38)* |
| Overweight (25-29.9kg/m <sup>2</sup> ) | Low  | 1.25 (0.75-2.07)  | 1.17 (0.69-1.98)  |
|                                        | High | 2.64 (1.86-3.76)* | 2.45 (1.61-3.71)* |

\* statistically significant at .05

1  
2  
3 Figure 1. Comparisons of Receiver Operating Characteristic (ROC) curves among BMI only,  
4 %BF only and Combined form of BMI and %BF  
5  
6  
7  
8

9 1-a. ROC curve for %BF only (AUC=.5342)  
10

11 1-b. ROC curve for BMI only (AUC=.5571)  
12

13 1-c. ROC curve for Combined form of %BF and BMI (AUC=0.5663)  
14  
15  
16  
17  
18  
19  
20  
21  
22  
23  
24  
25  
26  
27  
28  
29  
30  
31  
32  
33  
34  
35  
36  
37  
38  
39  
40  
41  
42  
43  
44  
45  
46  
47  
48  
49  
50  
51  
52  
53  
54  
55  
56  
57  
58  
59  
60

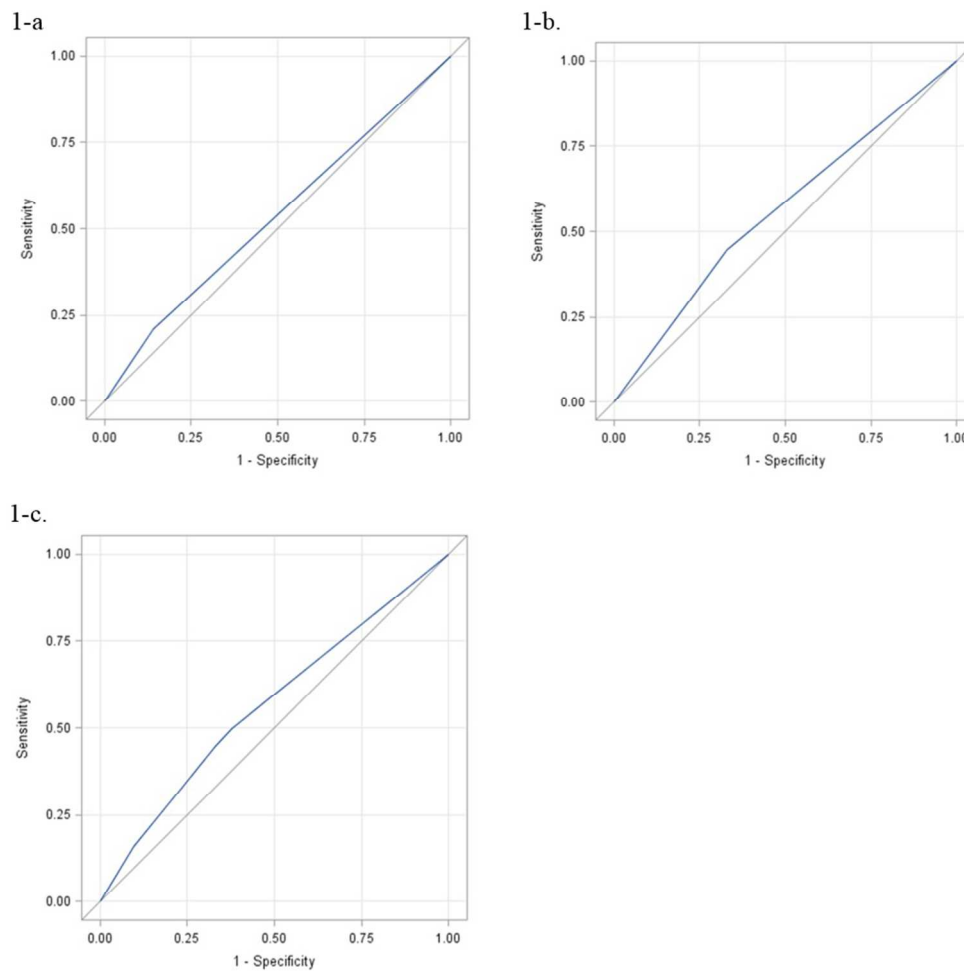

1-a. ROC curve for %BF only (AUC=.5342)

1-b. ROC curve for BMI only (AUC=.5571)

1-c. ROC curve for Combined form of %BF and BMI (AUC=0.5663)

89x88mm (300 x 300 DPI)

**STROBE 2007 (v4) Statement—Checklist of items that should be included in reports of *cross-sectional studies***

| Section/Topic             | Item # | Recommendation                                                                                                                                                                       | Reported on page # |
|---------------------------|--------|--------------------------------------------------------------------------------------------------------------------------------------------------------------------------------------|--------------------|
| <b>Title and abstract</b> | 1      | (a) Indicate the study’s design with a commonly used term in the title or the abstract                                                                                               | 2                  |
|                           |        | (b) Provide in the abstract an informative and balanced summary of what was done and what was found                                                                                  | 2                  |
| <b>Introduction</b>       |        |                                                                                                                                                                                      |                    |
| Background/rationale      | 2      | Explain the scientific background and rationale for the investigation being reported                                                                                                 | 4                  |
| Objectives                | 3      | State specific objectives, including any prespecified hypotheses                                                                                                                     | 5                  |
| <b>Methods</b>            |        |                                                                                                                                                                                      |                    |
| Study design              | 4      | Present key elements of study design early in the paper                                                                                                                              | 5                  |
| Setting                   | 5      | Describe the setting, locations, and relevant dates, including periods of recruitment, exposure, follow-up, and data collection                                                      | 5                  |
| Participants              | 6      | (a) Give the eligibility criteria, and the sources and methods of selection of participants                                                                                          | 6                  |
| Variables                 | 7      | Clearly define all outcomes, exposures, predictors, potential confounders, and effect modifiers. Give diagnostic criteria, if applicable                                             | 6-7                |
| Data sources/ measurement | 8*     | For each variable of interest, give sources of data and details of methods of assessment (measurement). Describe comparability of assessment methods if there is more than one group | 5-7                |
| Bias                      | 9      | Describe any efforts to address potential sources of bias                                                                                                                            |                    |
| Study size                | 10     | Explain how the study size was arrived at                                                                                                                                            | 7                  |
| Quantitative variables    | 11     | Explain how quantitative variables were handled in the analyses. If applicable, describe which groupings were chosen and why                                                         | 6-7                |
| Statistical methods       | 12     | (a) Describe all statistical methods, including those used to control for confounding                                                                                                | 7                  |
|                           |        | (b) Describe any methods used to examine subgroups and interactions                                                                                                                  |                    |
|                           |        | (c) Explain how missing data were addressed                                                                                                                                          |                    |
|                           |        | (d) If applicable, describe analytical methods taking account of sampling strategy                                                                                                   | 7                  |
|                           |        | (e) Describe any sensitivity analyses                                                                                                                                                |                    |
| <b>Results</b>            |        |                                                                                                                                                                                      |                    |



|                          |     |                                                                                                                                                                                                              |       |
|--------------------------|-----|--------------------------------------------------------------------------------------------------------------------------------------------------------------------------------------------------------------|-------|
| Participants             | 13* | (a) Report numbers of individuals at each stage of study—eg numbers potentially eligible, examined for eligibility, confirmed eligible, included in the study, completing follow-up, and analysed            | 6     |
|                          |     | (b) Give reasons for non-participation at each stage                                                                                                                                                         | 6     |
|                          |     | (c) Consider use of a flow diagram                                                                                                                                                                           |       |
| Descriptive data         | 14* | (a) Give characteristics of study participants (eg demographic, clinical, social) and information on exposures and potential confounders                                                                     | 7, 15 |
|                          |     | (b) Indicate number of participants with missing data for each variable of interest                                                                                                                          |       |
| Outcome data             | 15* | Report numbers of outcome events or summary measures                                                                                                                                                         | 7, 16 |
| Main results             | 16  | (a) Give unadjusted estimates and, if applicable, confounder-adjusted estimates and their precision (eg, 95% confidence interval). Make clear which confounders were adjusted for and why they were included | 7-8   |
|                          |     | (b) Report category boundaries when continuous variables were categorized                                                                                                                                    | 7     |
|                          |     | (c) If relevant, consider translating estimates of relative risk into absolute risk for a meaningful time period                                                                                             |       |
| Other analyses           | 17  | Report other analyses done—eg analyses of subgroups and interactions, and sensitivity analyses                                                                                                               |       |
| <b>Discussion</b>        |     |                                                                                                                                                                                                              |       |
| Key results              | 18  | Summarise key results with reference to study objectives                                                                                                                                                     | 8     |
| Limitations              | 19  | Discuss limitations of the study, taking into account sources of potential bias or imprecision. Discuss both direction and magnitude of any potential bias                                                   | 9     |
| Interpretation           | 20  | Give a cautious overall interpretation of results considering objectives, limitations, multiplicity of analyses, results from similar studies, and other relevant evidence                                   | 8,9   |
| Generalisability         | 21  | Discuss the generalisability (external validity) of the study results                                                                                                                                        | 8     |
| <b>Other information</b> |     |                                                                                                                                                                                                              |       |
| Funding                  | 22  | Give the source of funding and the role of the funders for the present study and, if applicable, for the original study on which the present article is based                                                | 10    |

\*Give information separately for cases and controls in case-control studies and, if applicable, for exposed and unexposed groups in cohort and cross-sectional studies.

**Note:** An Explanation and Elaboration article discusses each checklist item and gives methodological background and published examples of transparent reporting. The STROBE checklist is best used in conjunction with this article (freely available on the Web sites of PLoS Medicine at <http://www.plosmedicine.org/>, Annals of Internal Medicine at <http://www.annals.org/>, and Epidemiology at <http://www.epidem.com/>). Information on the STROBE Initiative is available at [www.strobe-statement.org](http://www.strobe-statement.org).
